# Supplementary material for: DOSY NMR for monitoring self aggregation of bifunctional organocatalysts: increasing enantioselectivity with decreasing catalyst concentration
Source: Royal Society of Chemistry journal article supplement (doi:10.1039/c0ob00047g), 2010-01-01
Supplement: c0ob00047g.pdf [file c0ob00047g.pdf]

# DOSY NMR for Monitoring Self Aggregation of Bifunctional Organocatalysts: Increasing Enantioselectivity with Decreasing Catalyst Concentration

Hyeong Bin Jang,<sup>a</sup> Ho Sik Rho,<sup>a,b</sup> Joong Suk Oh,<sup>a</sup> Eun Hye Nam,<sup>a</sup>  
Sang Eun Park,<sup>a</sup> Han Yong Bae,<sup>a</sup> and Choong Eui Song<sup>\*a</sup>

<sup>a</sup>*Department of Chemistry and Department of Energy Science, Sungkyunkwan University, 300  
Cheoncheon, Jangan, Suwon, Gyeonggi, 440-746, Korea.*

*E-mail: s1673@skku.edu; Fax: (+82) 31-290-7075*

<sup>b</sup>*R&D Center, AmorePacific Corporation, Yongin, 446-729, Korea*

## Electronic Supplementary Information (ESI)

1. General
2. Procedure for the methanolysis of *meso*-1,2-cyclohexanedicarboxylic anhydride (5)
3. Procedure for the DKR reaction of racemic valine-derived azalactone (7)
4. Procedure for the conjugate addition of aryl thiol to 2-cyclohexene-1-one (9)
5. HPLC spectra for Figure 2
6. HPLC spectra for Figure 3
7. HPLC spectra for Figure 4
8. DOSY data for Table 1
9. HPLC spectra for Table 1
10. HPLC spectra for Figure 6
11. References

## 1. General

*meso*-1,2-Cyclohexanedicarboxylic anhydride (**5**), 2-cyclohexene-1-one (**9**) were purchased from Aldrich and used without further purification. The racemic valine-derived azlactone (**7**) was prepared from racemic valine according to the literature procedure.<sup>[1]</sup> Alcohols (methanol and allyl alcohol) and thiols (thiophenol and 2-methoxy thiophenol) were purchased from Aldrich and used without further purification. Thiourea catalysts (**1**<sup>[3]</sup>, **2**<sup>[3]</sup>, **3a**<sup>[2]</sup>, **3b**<sup>[2]</sup>) and squaramide catalysts (**4a**<sup>[4]</sup>, **4b**<sup>[4]</sup>) were prepared according to the literature procedure.

## 2. Procedure for the methanolysis of *meso*-1,2-cyclohexanedicarboxylic anhydride (**5**)

Methanol (202  $\mu$ L, 5 mmol) was added dropwise to a stirred solution of anhydrides (**5**, 0.5 mmol) and catalysts (**1**, **2**, **3a** and **4a**) (10 mol%) in appropriate solvents (2.5 mL - 40 mL) at the temperature indicated in Figure 2 (Table S1, S2, S3 and S4). The reaction mixture was stirred at that temperature until the starting material was consumed, as indicated by TLC analysis. The reaction was quenched by adding HCl (1N, 3 mL) in one portion. The aqueous phase was extracted with EtOAc (2  $\times$  100 mL). The organic phase was dried (MgSO<sub>4</sub>), filtered, and concentrated *in vacuo* to yield the crude product. Purification by column chromatography (EtOAc:Hexane = 1:4) gave hemiester product (**6**)

The enantiomeric excess (*ee*) of the product was determined by HPLC analysis of a diastereomeric mixture of the corresponding amide-ester prepared from hemiester **6** according to the literature procedure<sup>[5]</sup> (Scheme S1).

Scheme S1

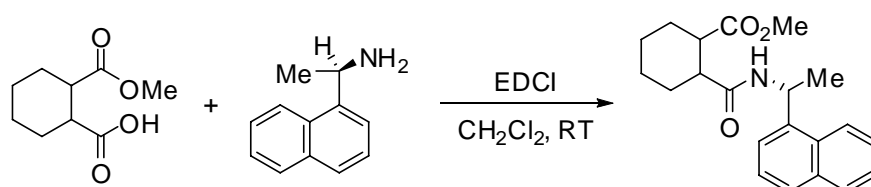

## 3. Procedure for the DKR reaction of racemic valine-derived azlactone (**7**)

Allyl alcohol (68  $\mu$ L, 1 mmol) was added to a stirred solution of the azlactones (**7**, 0.5 mmol) and catalyst (**3b** and **4b**) (10 mol%) in CH<sub>2</sub>Cl<sub>2</sub> (5 mL - 50 mL) at the temperature indicated in Figure 3 (Table S5 & S6). The reaction mixture was stirred at that temperature until the starting material was consumed, as indicated by TLC analysis. The reaction was quenched by adding HCl (1N, 3 mL) in one portion. The aqueous phase was extracted with EtOAc (2  $\times$  100 mL). The organic phase was dried (MgSO<sub>4</sub>), filtered, and concentrated *in vacuo* to yield the crude product. Purification by column chromatography (EtOAc:Hexane = 1:4) gave *N*-benzoylated  $\alpha$ -amino allyl ester (**8**).

## 4. Procedure for the conjugate addition of aryl thiol to 2-cyclohexene-1-one (**9**)

Thiophenol (61  $\mu$ L, 0.6 mmol) or 2-methoxybenzenethiol (73  $\mu$ L, 0.6 mmol) was added in one portion to a stirred solution of 2-cyclohexene-1-one (**9**, 0.5 mmol) and thiourea catalyst **3a** (0.25 mol% - 100 mol%) and squaramide catalyst **4a** (0.25 mol% - 10 mol%) in CH<sub>2</sub>Cl<sub>2</sub> (0.6 mL - 20 mL) at the temperature indicated in Figure 3 (Table S7 & S8) and Table 1 (Table S11 & S12). The reaction mixture was stirred at that temperature until the starting material was consumed, as indicated by TLC analysis. The reaction was quenched by adding HCl (1N, 3 mL) in one portion. The aqueous phase was extracted with EtOAc (2  $\times$  100 mL). The organic phase was dried (MgSO<sub>4</sub>), filtered, and concentrated *in vacuo* to yield the crude product. Purification by column chromatography (EtOAc:Hexane = 1:4) gave thiol added products (**10** and **12**)

## 5. HPLC spectra for Figure 2

Table S1. Concentration and temperature effects on enantioselectivity in the desymmetrization of *meso*-anhydride **5** using the catalyst **1** (Figure 2)

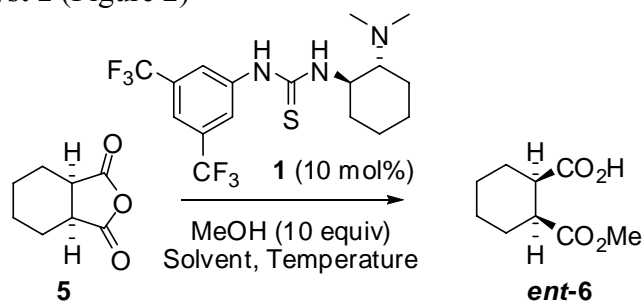

| Entry | Concentration             | T (°C) | Time (h) | Yield (%) <sup>[b]</sup> | % ee <sup>[c]</sup> |
|-------|---------------------------|--------|----------|--------------------------|---------------------|
| 1     | THF (40 mL, 0.0125 M)     | RT     | 12       | 82                       | 92                  |
| 2     | THF (10 mL, 0.05 M)       | RT     | 4        | 81                       | 85                  |
| 3     | THF (2.5 mL, 0.2 M)       | RT     | 1.6      | 84                       | 63                  |
| 4     | THF (2.5 mL, 0.2 M)       | 0 °C   | 5        | 83                       | 55                  |
| 5     | THF (2.5 mL, 0.2 M)       | -20 °C | 24       | 80                       | 51                  |
| 6     | Toluene (40 mL, 0.0125 M) | RT     | 11       | 81                       | 61                  |
| 7     | Toluene (10 mL, 0.05 M)   | RT     | 3.5      | 80                       | 48                  |
| 8     | Toluene (2.5 mL, 0.2 M)   | RT     | 1.2      | 85                       | 36                  |
| 9     | Toluene (2.5 mL, 0.2 M)   | 0 °C   | 4        | 83                       | 23                  |
| 10    | Toluene (2.5 mL, 0.2 M)   | -20 °C | 22       | 81                       | 11                  |

<sup>[a]</sup> Reactions were carried out with **5** (0.5 mmol), MeOH (5 mmol) and **1** (10 mol%, 0.05 mmol). <sup>[b]</sup>

Isolated yields after chromatographic purification. <sup>[c]</sup> ee value of *ent-6* was determined by HPLC.

### HPLC spectra for Table S1.

The ee value was determined by the HPLC analysis (Hypersil, Hexanes : IPA (40 : 1), 1 mL/min,  $t(\text{minor}) = 8.30$  min,  $t(\text{major}) = 11.33$  min) of the diastereomeric mixture of the corresponding amide-ester, which was prepared as depicted in Scheme S1.

**Table S1. Entry 1**

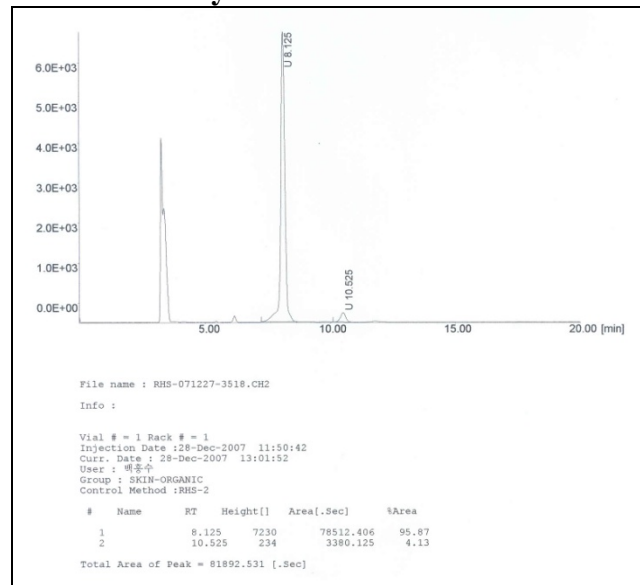

**Table S1. Entry 2**

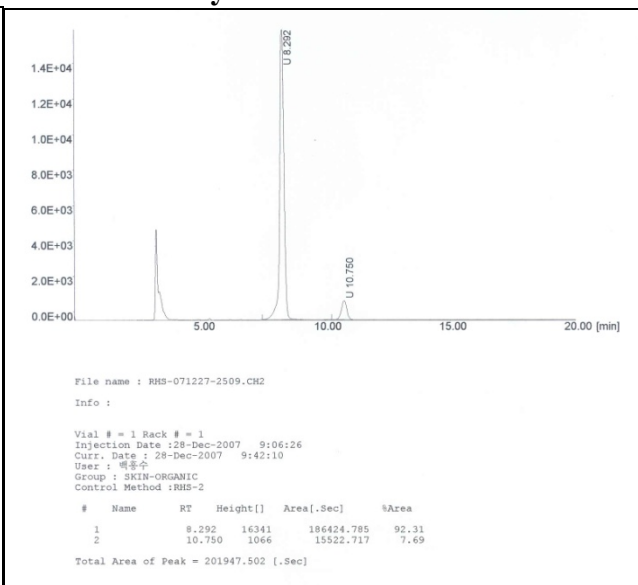

**Table S1. Entry 3**

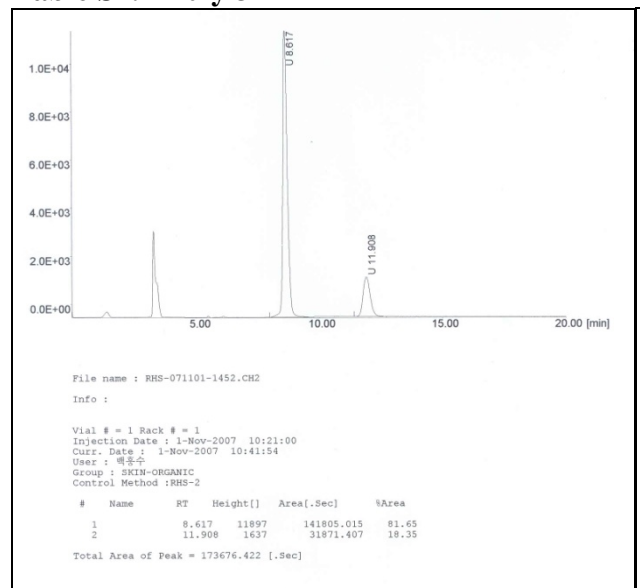

**Table S1. Entry 4**

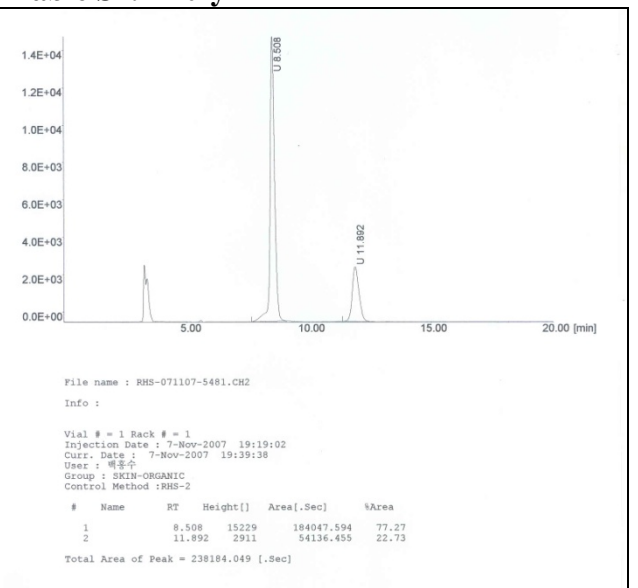

**Table S1. Entry 5**

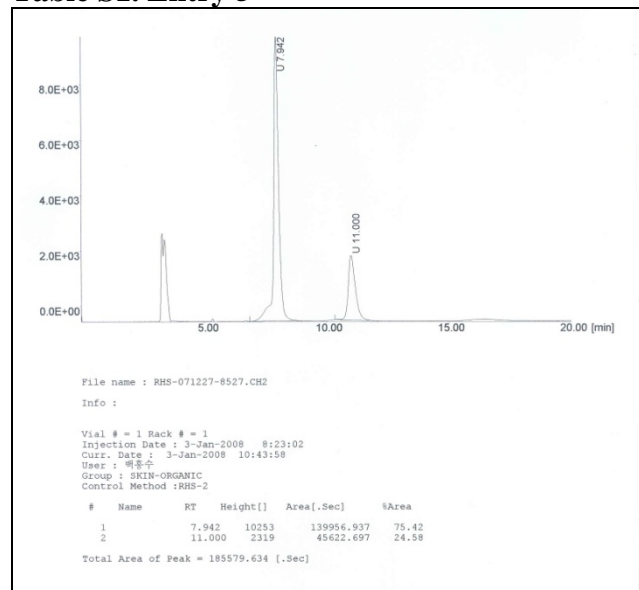

**Table S1. Entry 6**

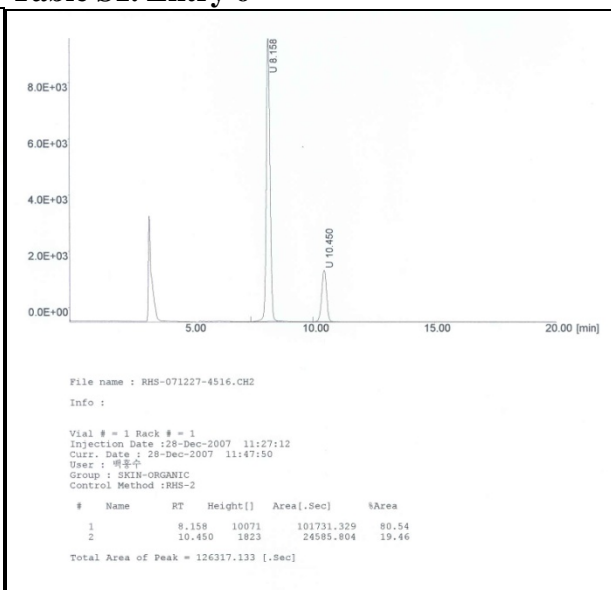

**Table S1. Entry 7**

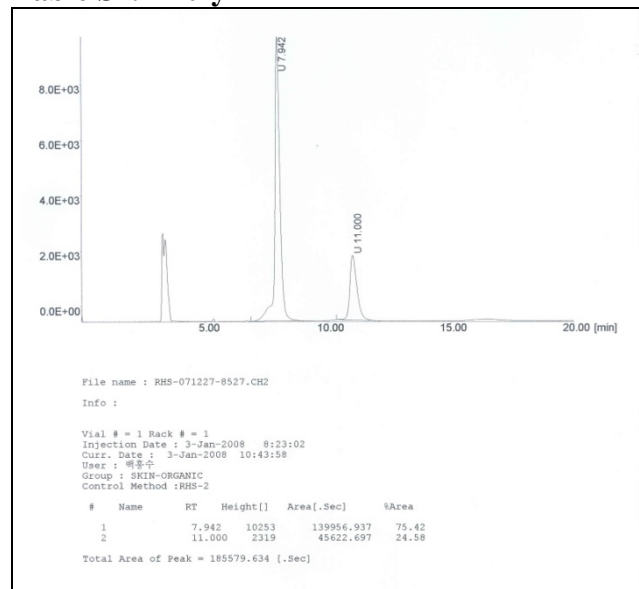

**Table S1. Entry 8**

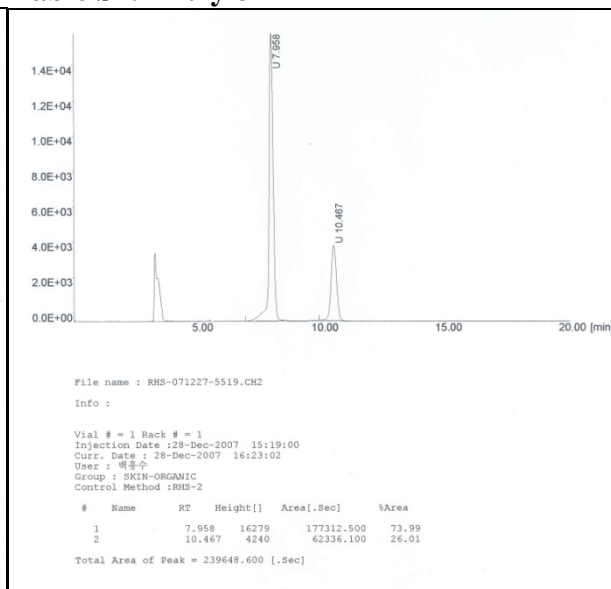

**Table S1. Entry 9**

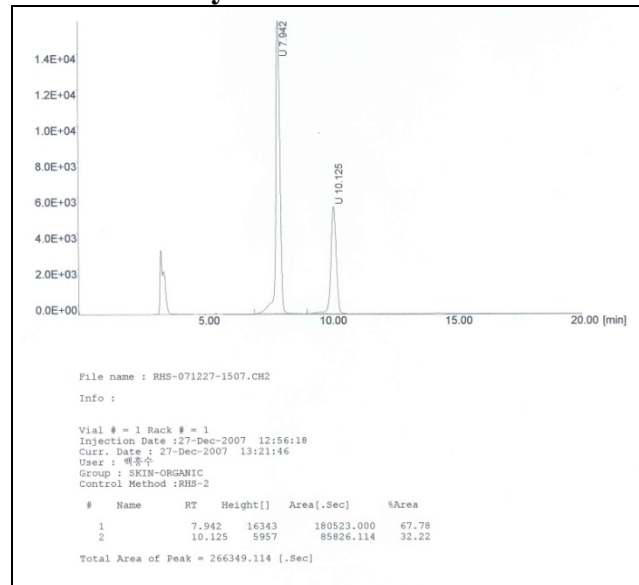

**Table S1. Entry 10**

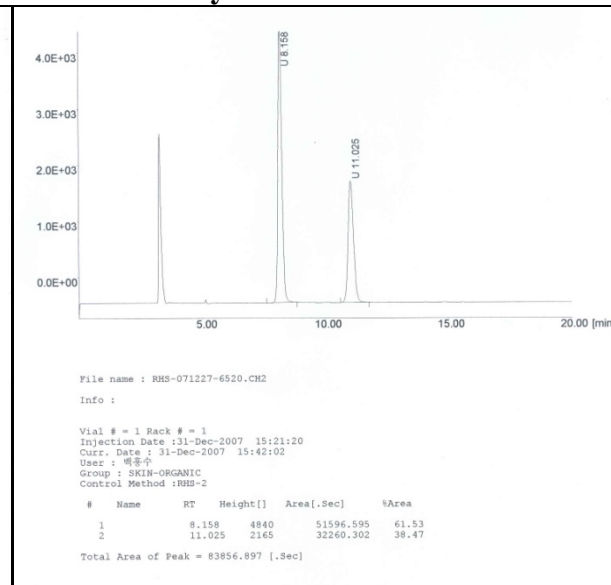

Table S2. Concentration and temperature effect on enantioselectivity in the desymmetrization of *meso*-anhydride **5** using the catalyst **2** (Figure 2)

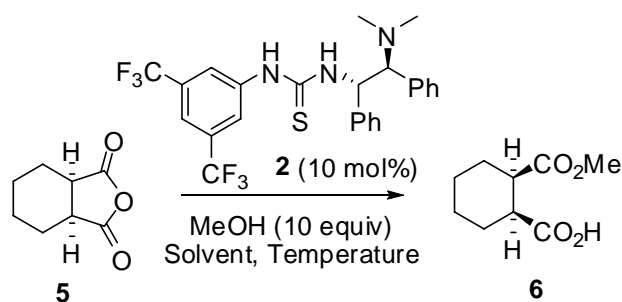

| Entry | Concentration         | T (°C) | Time (h) | Yield (%) <sup>[b]</sup> | % ee <sup>[c]</sup> |
|-------|-----------------------|--------|----------|--------------------------|---------------------|
| 1     | THF (40 mL, 0.0125 M) | RT     | 17       | 89                       | 94                  |
| 2     | THF (10 mL, 0.05 M)   | RT     | 9.5      | 87                       | 93                  |
| 3     | THF (2.5 mL, 0.2 M)   | RT     | 2        | 91                       | 89                  |
| 4     | THF (2.5 mL, 0.2 M)   | 0 °C   | 4        | 90                       | 89                  |
| 5     | THF (2.5 mL, 0.2 M)   | -20 °C | 9        | 89                       | 83                  |

<sup>[a]</sup> Reactions were carried out with **5** (0.5 mmol), MeOH (5 mmol) and **2** (10 mol%, 0.05 mmol). <sup>[b]</sup> Isolated yields after chromatographic purification. <sup>[c]</sup> ee value of **6** was determined by HPLC.

### HPLC spectra for Table S2.

Table S2. Entry 1

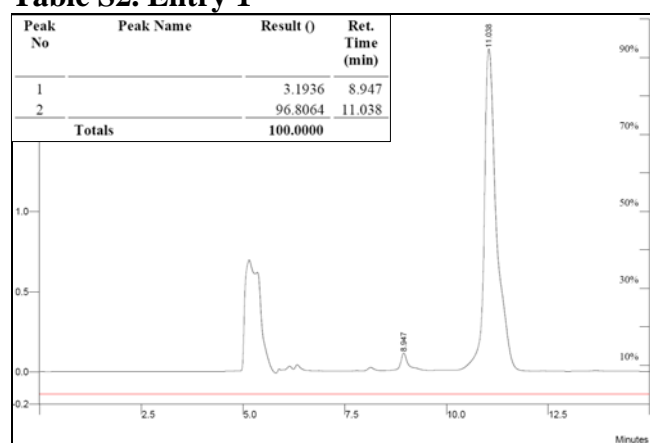

Table S2. Entry 2

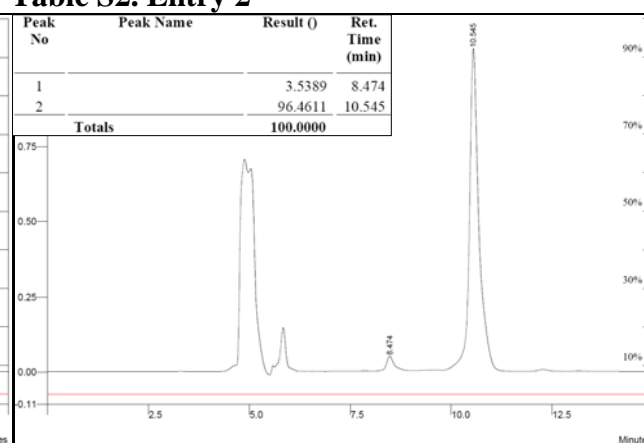

Table S2. Entry 3

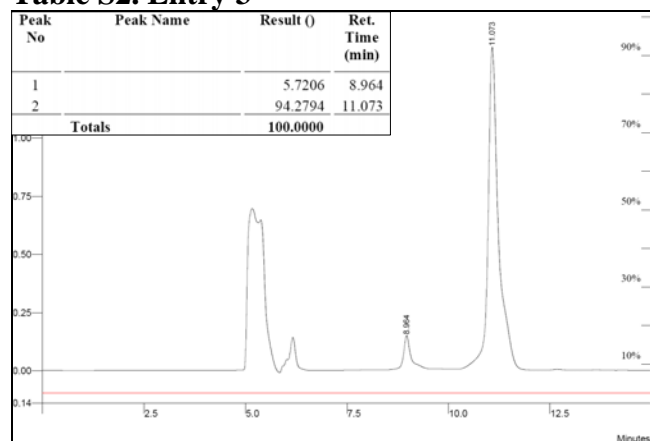

Table S2. Entry 4

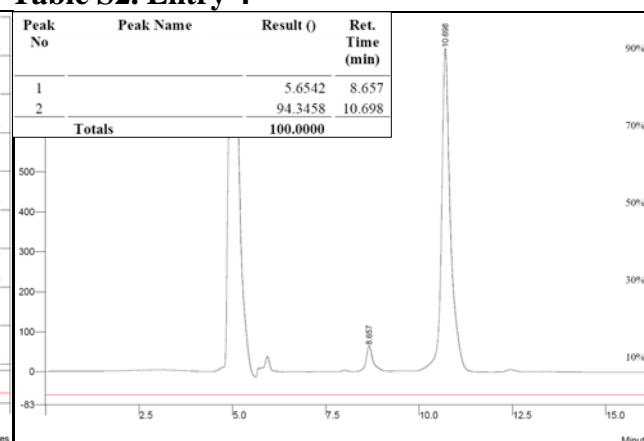

**Table S2. Entry 5**

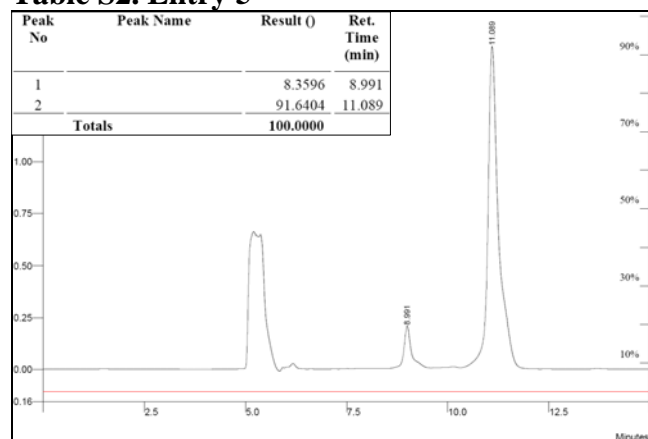

**Table S3. Concentration and temperature effects on enantioselectivity in the methanolytic desymmetrization of *meso*-anhydride **5** using the catalyst **3a** (Figure 2)**

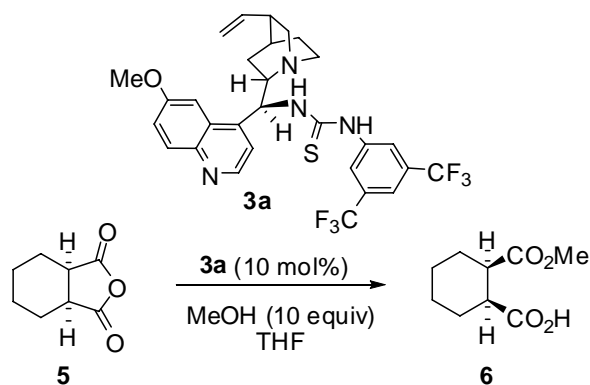

| Entry | Concentration         | T (°C) | Time (h) | Yield (%) <sup>[b]</sup> | % ee <sup>[c]</sup> |
|-------|-----------------------|--------|----------|--------------------------|---------------------|
| 1     | THF (40 mL, 0.0125 M) | RT     | 10       | 84                       | 95                  |
| 2     | THF (10 mL, 0.05 M)   | RT     | 7        | 83                       | 93                  |
| 3     | THF (2.5 mL, 0.2 M)   | RT     | 0.6      | 82                       | 82                  |
| 4     | THF (2.5 mL, 0.2 M)   | 0 °C   | 5.5      | 81                       | 81                  |
| 5     | THF (2.5 mL, 0.2 M)   | -20 °C | 11       | 80                       | 77                  |

<sup>[a]</sup> Reactions were carried out with **5** (0.5 mmol), MeOH (5 mmol) and **3a** (10 mol%, 0.05 mmol). <sup>[b]</sup> Isolated yields after chromatographic purification. <sup>[c]</sup> Ee value of **6** was determined by HPLC.

### HPLC spectra for Table S3.

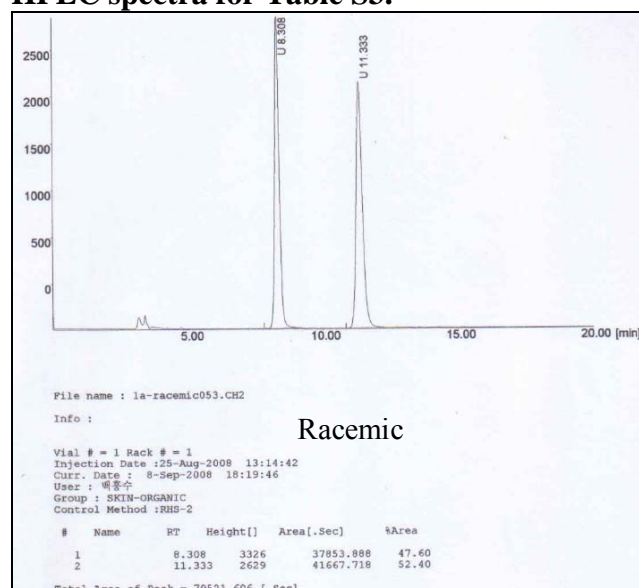

Table S3. Entry 1

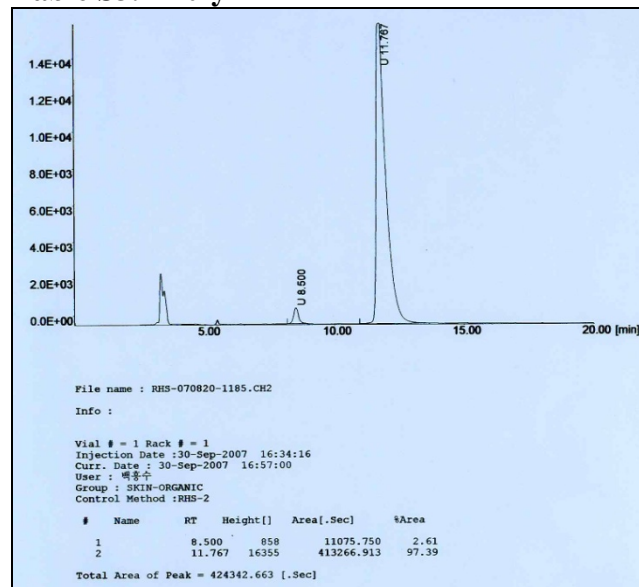

Table S3. Entry 2

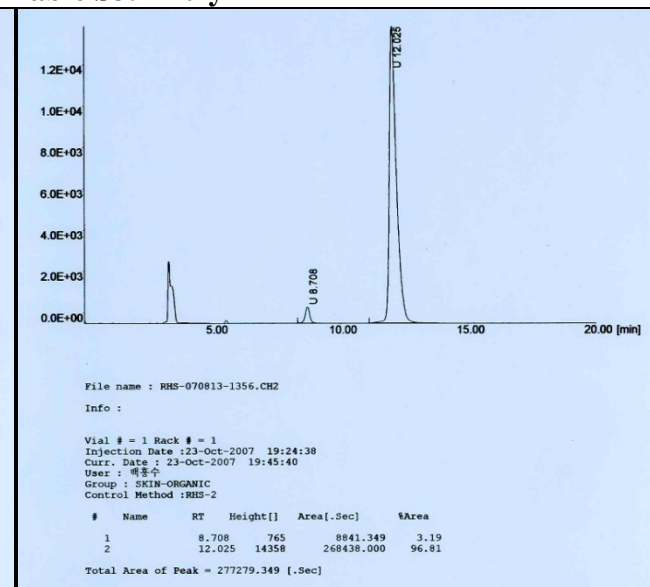

Table S3. Entry 3

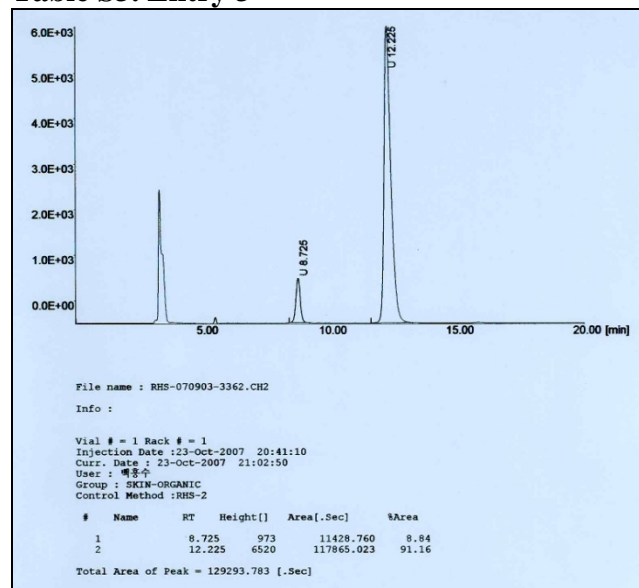

Table S3. Entry 4

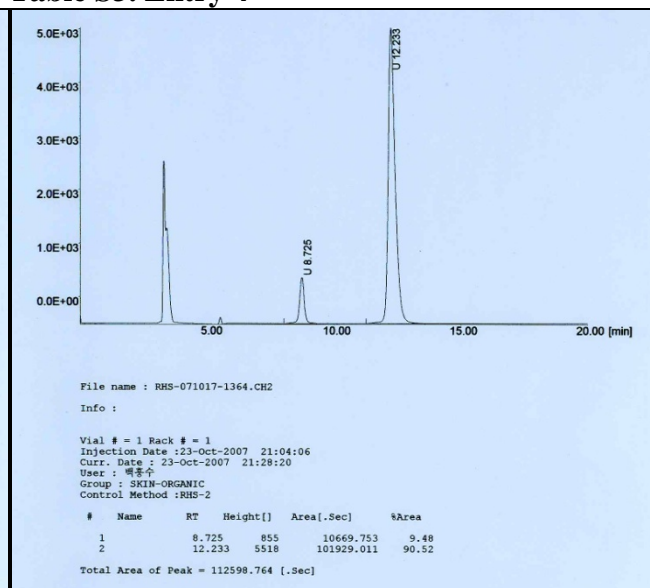



**Table S3. Entry 5**

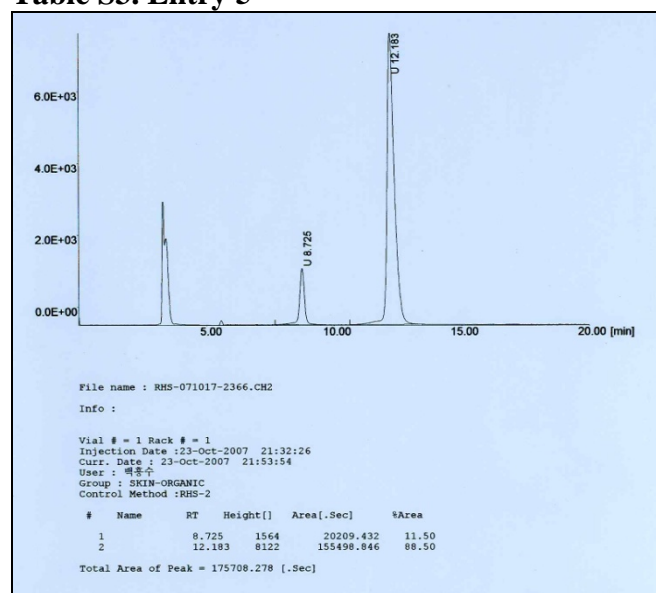

**Table S4. Concentration and temperature effects on enantioselectivity in the methanolytic desymmetrization of *meso*-anhydride **5** using the catalyst **4a** (Figure 2)**

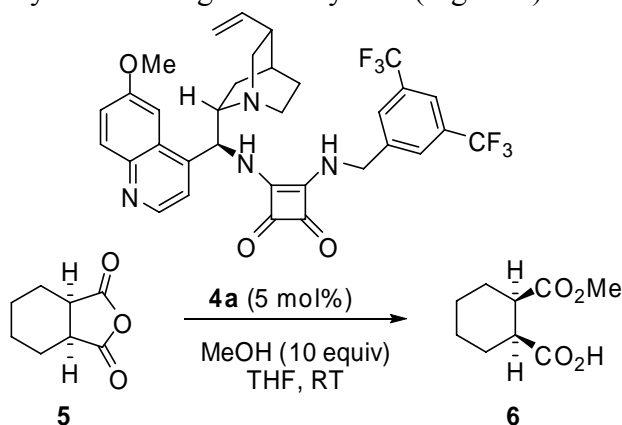

| Entry | Concentration | T (°C) | Time (h) | Yield (%) <sup>[b]</sup> | % ee <sup>[c]</sup> |
|-------|---------------|--------|----------|--------------------------|---------------------|
| 1     | THF (10 mL)   | RT     | 5        | 88                       | 96                  |
| 2     | THF (5 mL)    | RT     | 2.5      | 86                       | 94                  |
| 3     | THF (2.5 mL)  | RT     | 1        | 85                       | 91                  |

<sup>[a]</sup> Reactions were carried out with **5** (0.5 mmol), MeOH (5 mmol) and **4a** (5 mol%, 0.025 mmol). <sup>[b]</sup> Isolated yields after chromatographic purification. <sup>[c]</sup> Ee value of **6** was determined by HPLC.

## HPLC spectra for Table S4.

### Table S4. Entry 1

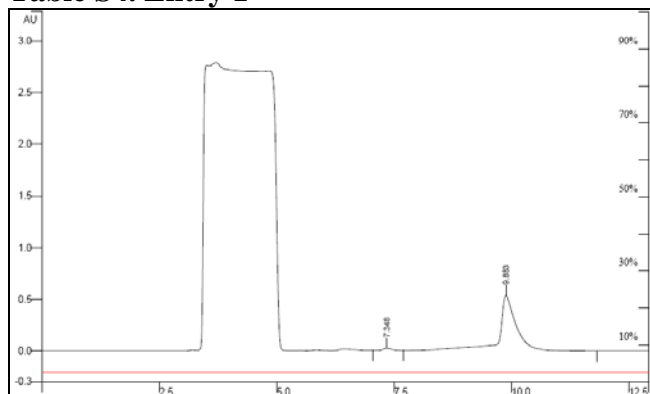

| Peak No         | Result () | Ret. Time (min) | Area (counts)    | Width 1/2 (sec) |
|-----------------|-----------|-----------------|------------------|-----------------|
| 1               | 1.7635    | 7.348           | 2484306          | 10.4            |
| 2               | 98.2365   | 9.883           | 138387040        | 17.3            |
| <b>100.0000</b> |           |                 | <b>140871344</b> |                 |

### Table S4. Entry 2

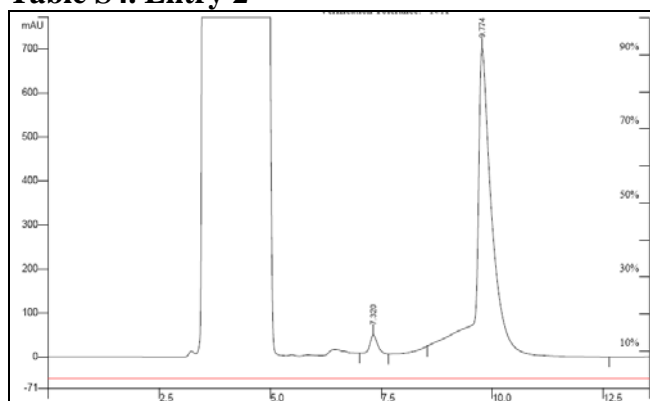

| Peak No         | Result () | Ret. Time (min) | Area (counts)    | Width 1/2 (sec) |
|-----------------|-----------|-----------------|------------------|-----------------|
| 1               | 3.1719    | 7.320           | 4790105          | 10.2            |
| 2               | 96.8281   | 9.774           | 146226704        | 16.4            |
| <b>100.0000</b> |           |                 | <b>151016816</b> |                 |

### Table S4. Entry 3

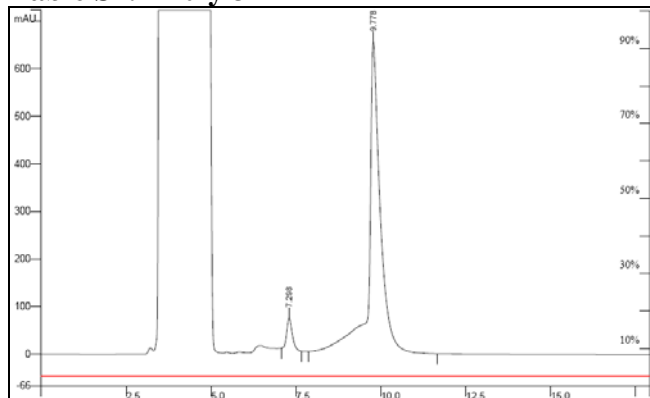

| Peak No         | Result () | Ret. Time (min) | Area (counts)    | Width 1/2 (sec) |
|-----------------|-----------|-----------------|------------------|-----------------|
| 1               | 4.5564    | 7.298           | 7328855          | 9.8             |
| 2               | 95.4436   | 9.778           | 153517808        | 16.0            |
| <b>100.0000</b> |           |                 | <b>160846656</b> |                 |

## 6. HPLC spectra for Figure 3

Table S5. Concentration effect on enantioselectivity in the DKR reaction of *rac*-azlactone **7** using the catalyst **3b** (Figure 3)

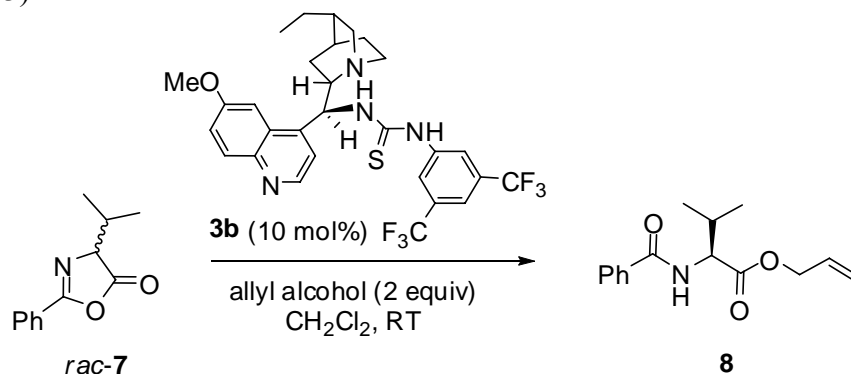

| Entry | Concentration                                     | T (°C) | Time (h) | Yield (%) | % ee <sup>[b]</sup> |
|-------|---------------------------------------------------|--------|----------|-----------|---------------------|
| 1     | CH <sub>2</sub> Cl <sub>2</sub> (5 mL, 0.1 M)     | RT     | 12       | 91        | 77.6                |
| 2     | CH <sub>2</sub> Cl <sub>2</sub> (2.5 mL, 0.2 M)   | RT     | 12       | 93        | 76.2                |
| 3     | CH <sub>2</sub> Cl <sub>2</sub> (1.25 mL, 0.4 M)  | RT     | 12       | 93        | 75.4                |
| 4     | CH <sub>2</sub> Cl <sub>2</sub> (0.83 mL, 0.6 M)  | RT     | 12       | 93        | 74.5                |
| 5     | CH <sub>2</sub> Cl <sub>2</sub> (0.625 mL, 0.8 M) | RT     | 12       | 97        | 74                  |
| 6     | CH <sub>2</sub> Cl <sub>2</sub> (0.5 mL, 1.0 M)   | RT     | 12       | 98        | 72.7                |

<sup>[a]</sup> Reactions were carried out with *rac*-**7** (0.5 mmol), 2 equiv of allyl alcohol (2 equiv, 1 mmol) and **3b** (10 mol%, 0.05 mmol) in CH<sub>2</sub>Cl<sub>2</sub> at room temperature. <sup>[b]</sup> Ee value of **8** was determined by HPLC.

### HPLC spectra for Table S5.

The ee value was determined by the HPLC analysis (Chiralpak OD-H, Hexanes : IPA (9 : 1), 1 mL/min, UV detection at 220 nm, *t*(minor) = 5.70 min, *t*(major) = 9.12 min).

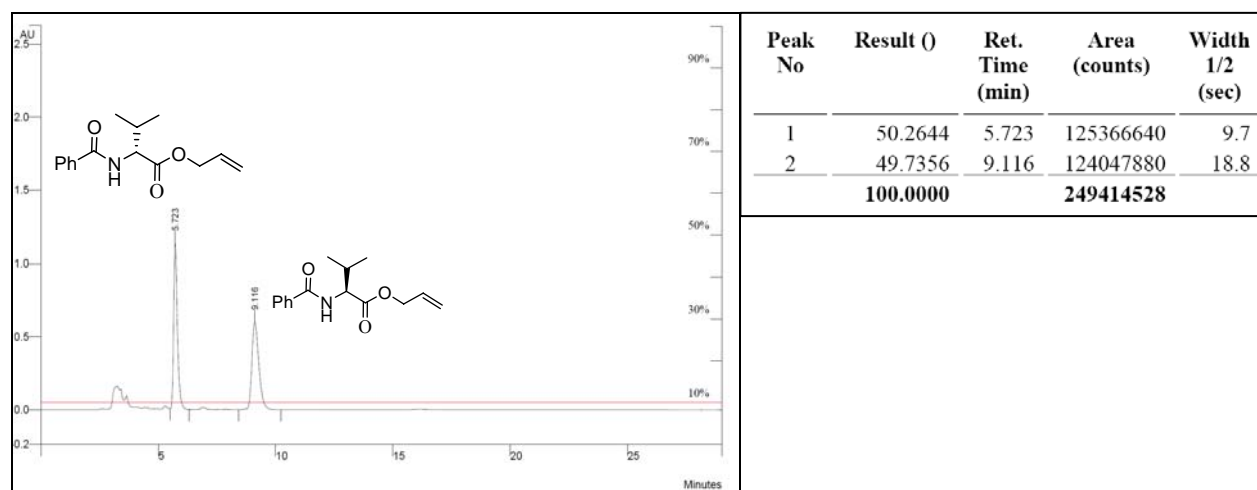

**Table S5. Entry 1**

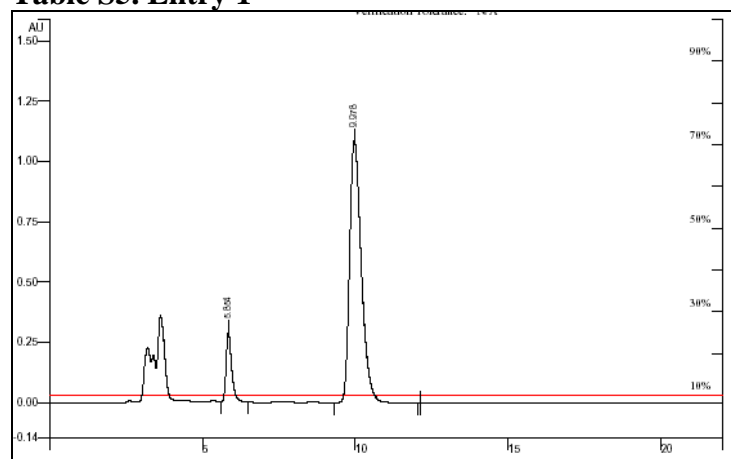

| Peak No | Result () | Ret. Time (min) | Area (counts)   | Width 1/2 (sec)  |
|---------|-----------|-----------------|-----------------|------------------|
| 1       | 11.1874   | 5.854           | 36536100        | 11.0             |
| 2       | 88.8126   | 9.978           | 290046400       | 24.3             |
|         |           |                 | <b>100.0000</b> | <b>326582496</b> |

**Table S5. Entry 2**

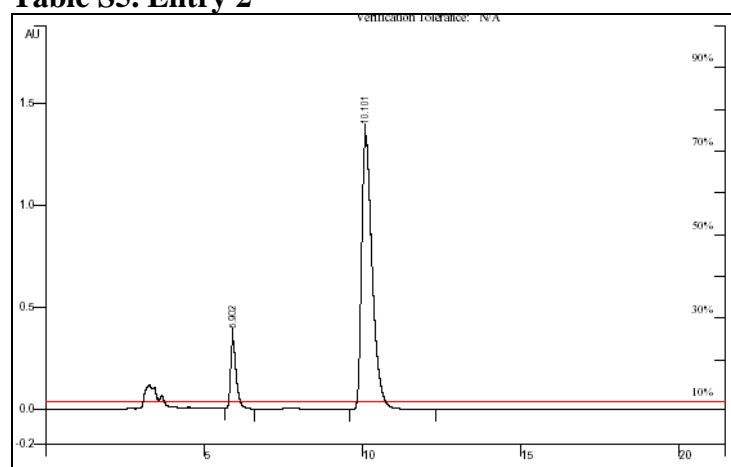

| Peak No | Result () | Ret. Time (min) | Area (counts)   | Width 1/2 (sec)  |
|---------|-----------|-----------------|-----------------|------------------|
| 1       | 11.8875   | 5.902           | 42144480        | 11.0             |
| 2       | 88.1125   | 10.101          | 312382304       | 21.1             |
|         |           |                 | <b>100.0000</b> | <b>354526784</b> |

**Table S5. Entry 3**

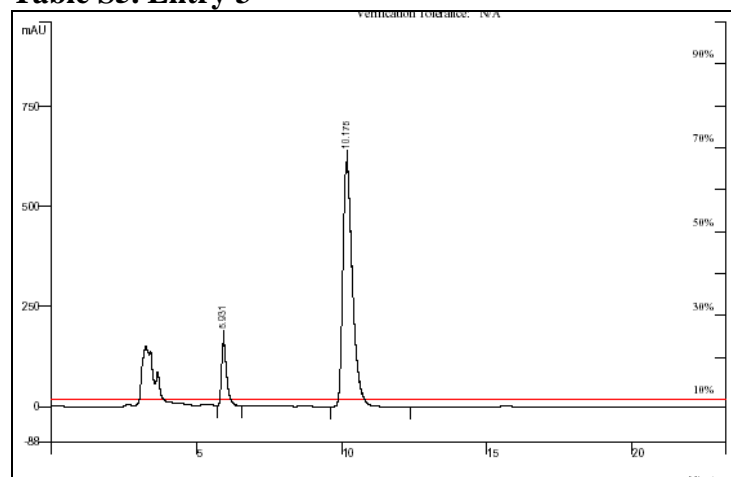

| Peak No | Result () | Ret. Time (min) | Area (counts)   | Width 1/2 (sec)  |
|---------|-----------|-----------------|-----------------|------------------|
| 1       | 12.2770   | 5.931           | 19776174        | 10.8             |
| 2       | 87.7230   | 10.175          | 141306960       | 20.7             |
|         |           |                 | <b>100.0000</b> | <b>161083136</b> |

**Table S5. Entry 4**

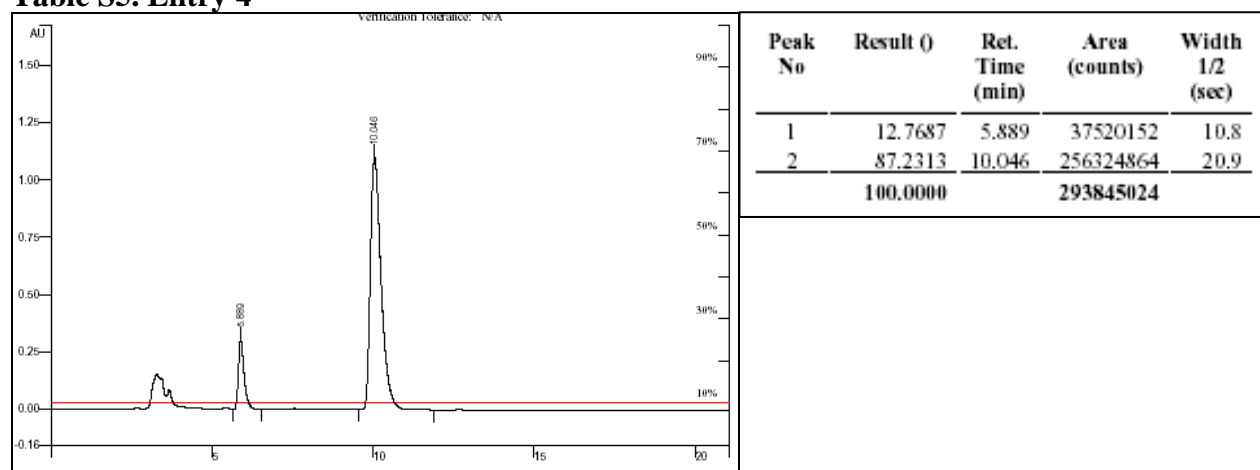

**Table S5. Entry 5**

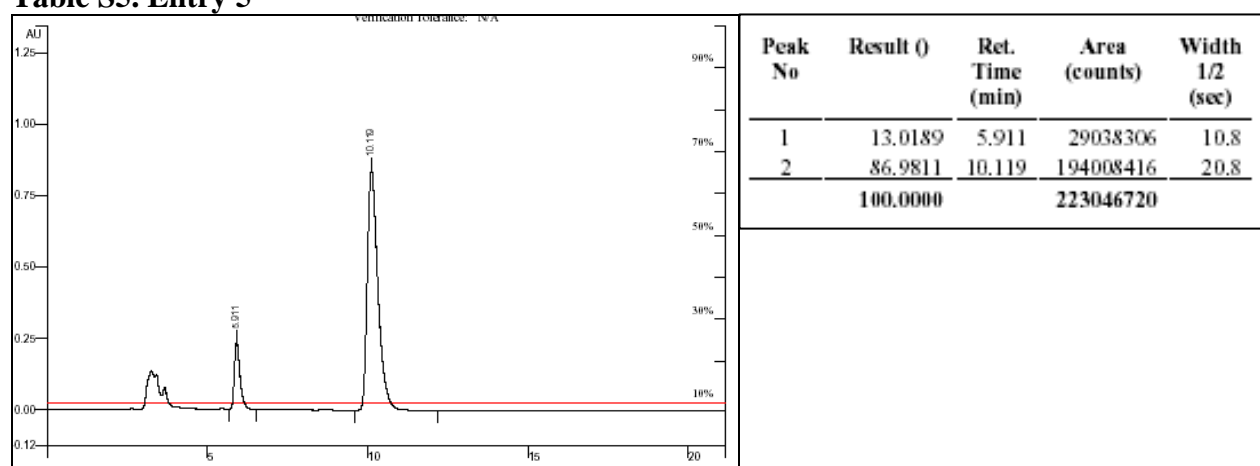

**Table S5. Entry 6**

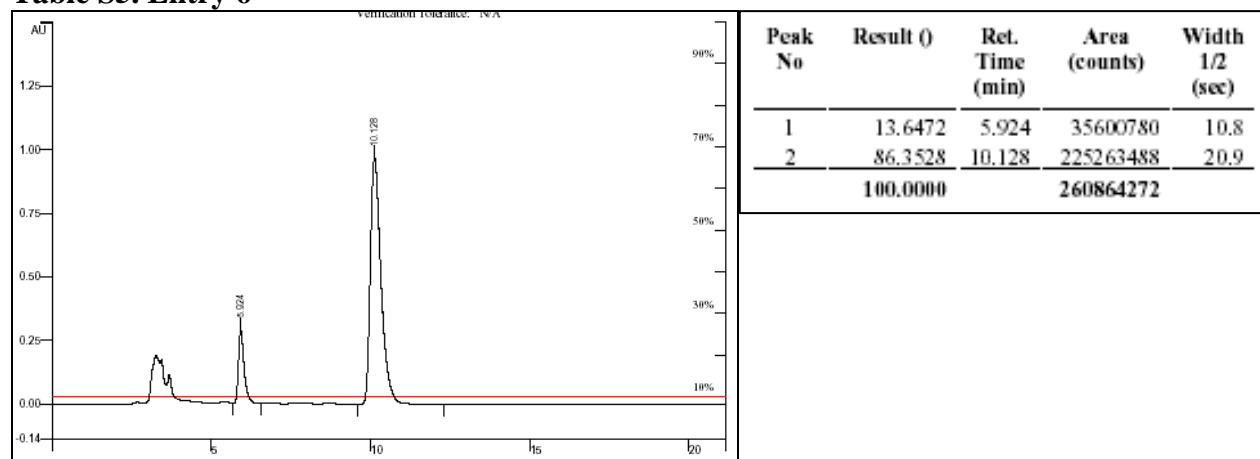

Table S6. Concentration effect on enantioselectivity in the DKR reaction of *rac*-azlactone **7** using the catalyst **4b** (Figure 3) <sup>[6]</sup>

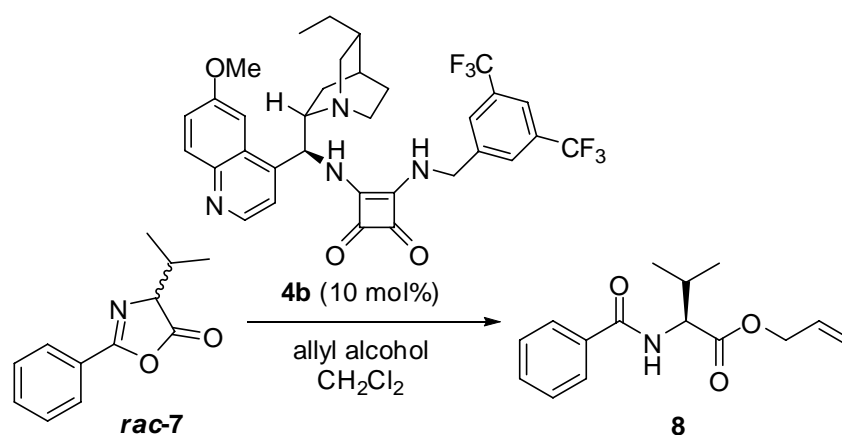

| Entry | Concentration                           | T (°C) | Time (h) | Yield (%) | % ee <sup>[b]</sup> |
|-------|-----------------------------------------|--------|----------|-----------|---------------------|
| 1     | CH <sub>2</sub> Cl <sub>2</sub> (0.1 M) | rt     | 12       | 84        | 88                  |
| 2     | CH <sub>2</sub> Cl <sub>2</sub> (0.2 M) | rt     | 12       | 86        | 87                  |
| 3     | CH <sub>2</sub> Cl <sub>2</sub> (0.4 M) | rt     | 12       | 89        | 87                  |
| 4     | CH <sub>2</sub> Cl <sub>2</sub> (0.6 M) | rt     | 12       | 91        | 86                  |
| 5     | CH <sub>2</sub> Cl <sub>2</sub> (0.8 M) | rt     | 12       | 94        | 85                  |
| 6     | CH <sub>2</sub> Cl <sub>2</sub> (1.0 M) | rt     | 12       | 98        | 84                  |

<sup>[a]</sup> Reactions were carried out with *rac*-**7** (0.5 mmol), 2 equiv of allyl alcohol (2 equiv, 1 mmol) and **4b** (10 mol%, 0.05 mmol) in CH<sub>2</sub>Cl<sub>2</sub> at room temperature. <sup>[b]</sup> ee value of **8** was determined by HPLC.

### HPLC spectra for Table S6.

The ee value was determined by the HPLC analysis (Chiralpak OD-H, Hexanes : IPA (9 : 1), 1 mL/min, UV detection at 220 nm, *t*(minor) = 5.70 min, *t*(major) = 9.12 min).

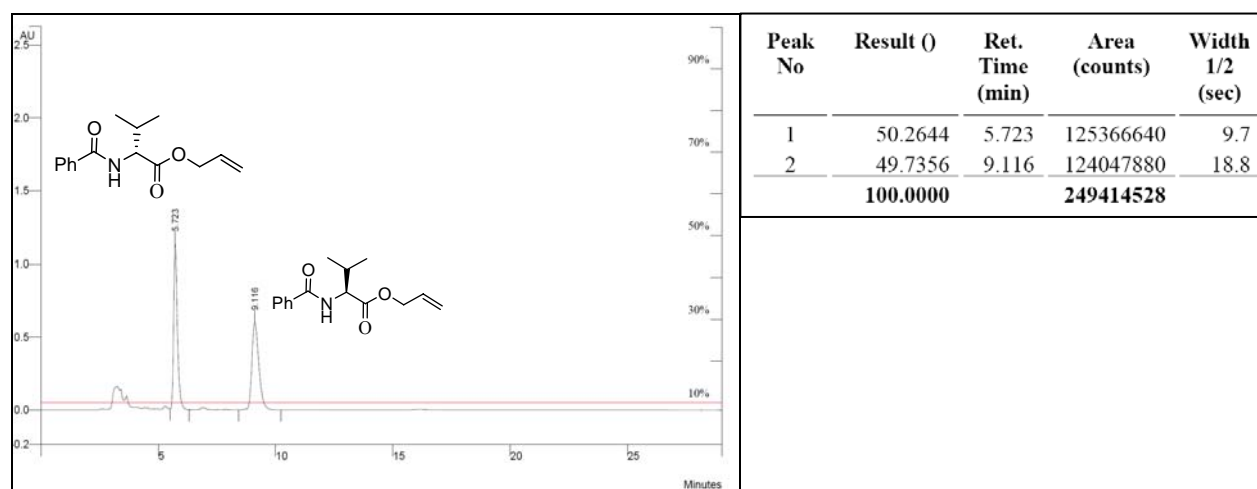

**Table S6. Entry 1**

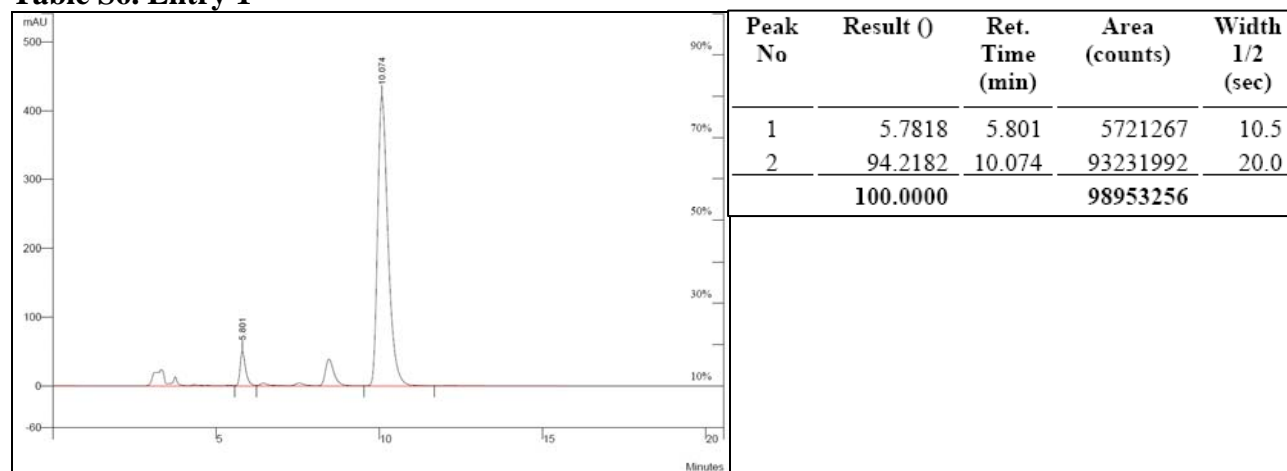

**Table S6. Entry 2**

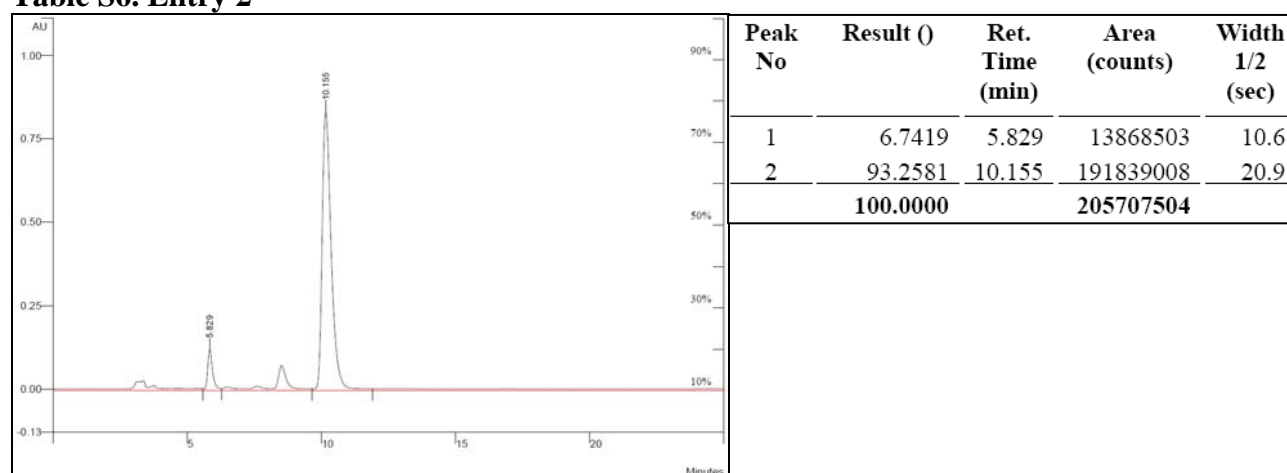

**Table S6. Entry 3**

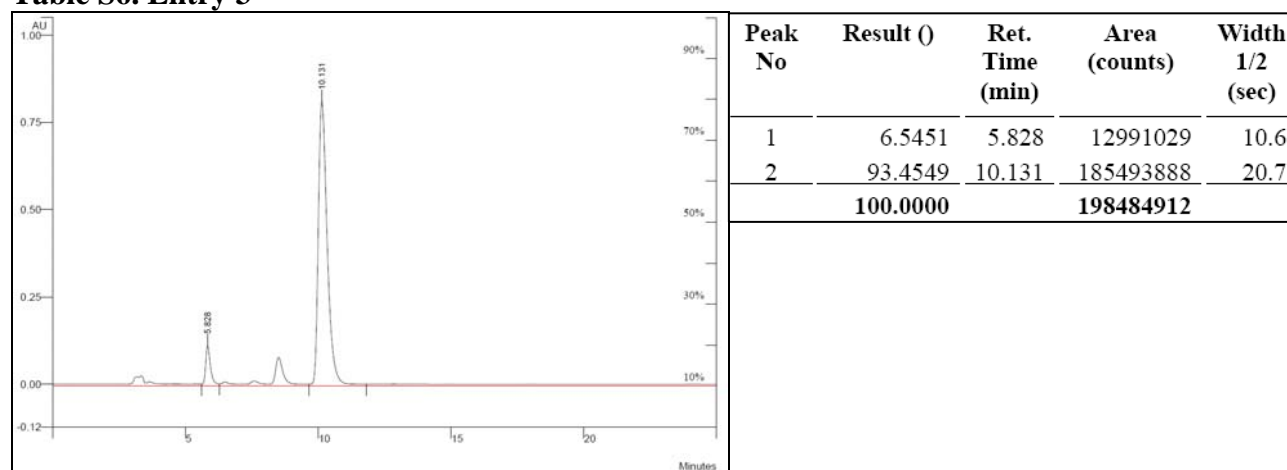

**Table S6. Entry 4**

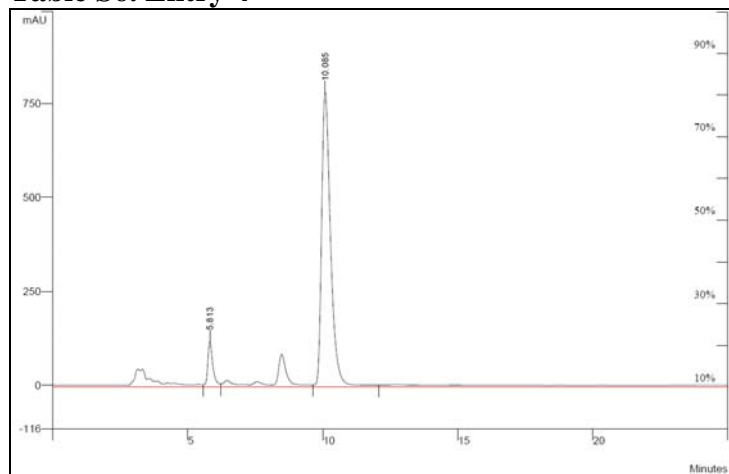

| Peak No | Result () | Ret. Time (min) | Area (counts)   | Width 1/2 (sec)  |
|---------|-----------|-----------------|-----------------|------------------|
| 1       | 7.1164    | 5.813           | 13481109        | 10.7             |
| 2       | 92.8836   | 10.085          | 175957072       | 20.4             |
|         |           |                 | <b>100.0000</b> | <b>189438176</b> |

**Table S6. Entry 5**

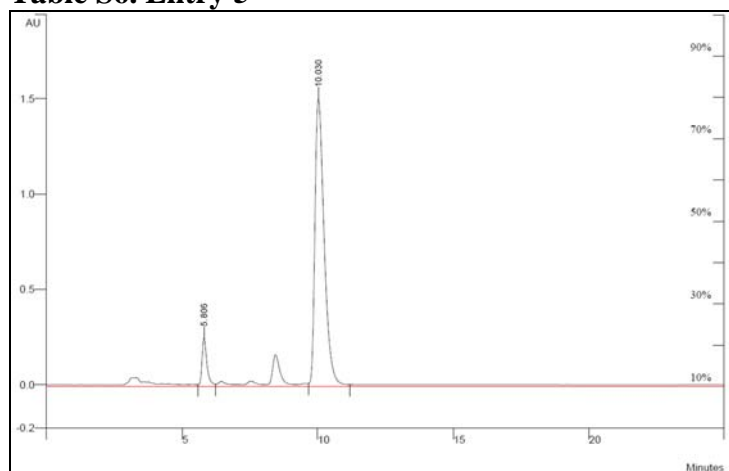

| Peak No | Result () | Ret. Time (min) | Area (counts)   | Width 1/2 (sec)  |
|---------|-----------|-----------------|-----------------|------------------|
| 1       | 7.5636    | 5.806           | 28478024        | 10.5             |
| 2       | 92.4364   | 10.030          | 348035456       | 21.3             |
|         |           |                 | <b>100.0000</b> | <b>376513472</b> |

**Table S6. Entry 6**

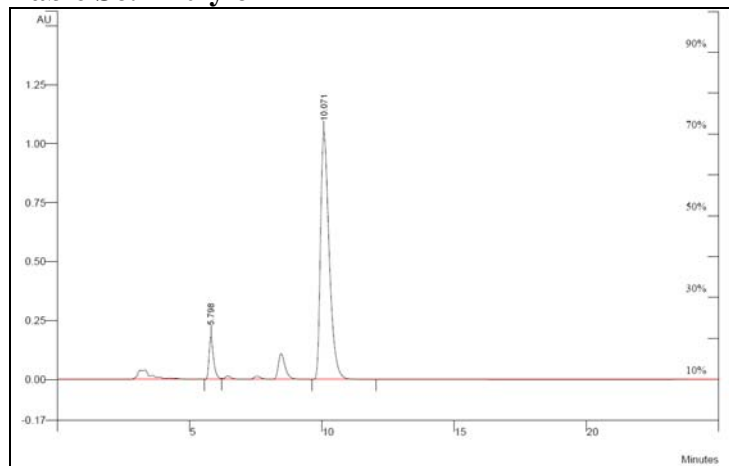

| Peak No | Result () | Ret. Time (min) | Area (counts)   | Width 1/2 (sec)  |
|---------|-----------|-----------------|-----------------|------------------|
| 1       | 8.0098    | 5.798           | 20840232        | 10.6             |
| 2       | 91.9902   | 10.071          | 239342352       | 20.7             |
|         |           |                 | <b>100.0000</b> | <b>260182592</b> |



## 7. HPLC spectra for Figure 4

Table S7. Concentration and temperature effect on enantioselectivity in the conjugate addition of benzene thiol to **9** using the catalyst **3a** (Figure 4)

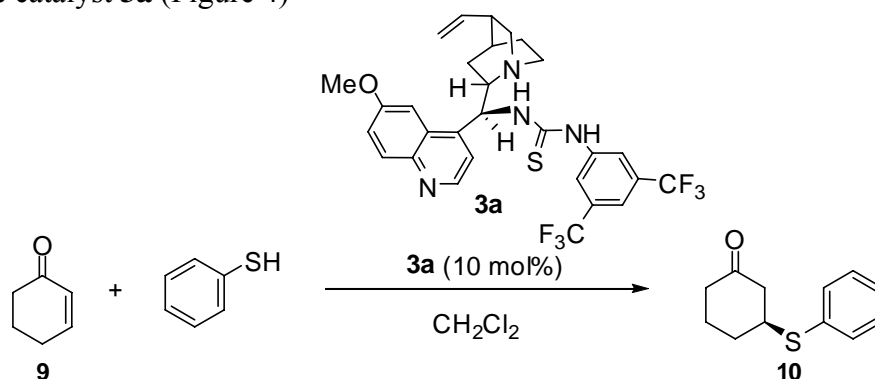

| Entry | Concentration                                    | T (°C) | Time (h) | Yield (%) <sup>[b]</sup> | % ee <sup>[c]</sup> |
|-------|--------------------------------------------------|--------|----------|--------------------------|---------------------|
| 1     | CH <sub>2</sub> Cl <sub>2</sub> (1 mL, 0.5 M)    | rt     | 2        | 83                       | 65                  |
| 2     | CH <sub>2</sub> Cl <sub>2</sub> (2.5 mL, 0.2 M)  | rt     | 4        | 79                       | 75                  |
| 3     | CH <sub>2</sub> Cl <sub>2</sub> (5 mL, 0.1 M)    | rt     | 6        | 81                       | 79                  |
| 4     | CH <sub>2</sub> Cl <sub>2</sub> (10 mL, 0.05 M)  | rt     | 10       | 78                       | 87                  |
| 5     | CH <sub>2</sub> Cl <sub>2</sub> (20 mL, 0.025 M) | rt     | 18       | 78                       | 87                  |
| 6     | CH <sub>2</sub> Cl <sub>2</sub> (1 mL, 0.5 M)    | 0      | 3        | 88                       | 56                  |
| 7     | CH <sub>2</sub> Cl <sub>2</sub> (1 mL, 0.5 M)    | -20    | 9        | 85                       | 51                  |

<sup>[a]</sup> Reactions were carried out with **9** (0.5 mmol), benzene thiol (0.6 mmol) and catalysts **3a** (10 mol%, 0.05 mmol) in CH<sub>2</sub>Cl<sub>2</sub>. <sup>[b]</sup> Isolated yields after chromatographic purification. <sup>[c]</sup> Ee value of **10** was determined by HPLC.

### HPLC spectra for Table S7.

The ee value was determined by the HPLC analysis (Chiralpak AS, Hexanes : IPA (1 : 1), 1 mL/min, UV detection at 220 nm, t(major) = 6.09 min, t(minor) = 15.36 min).

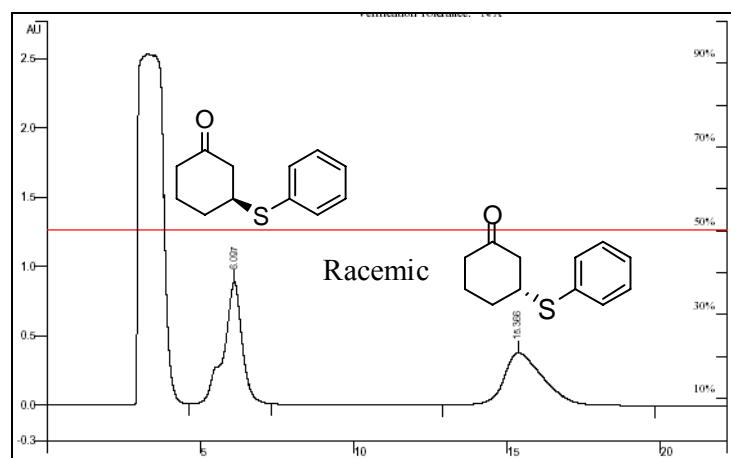

**Table S7. Entry 1**

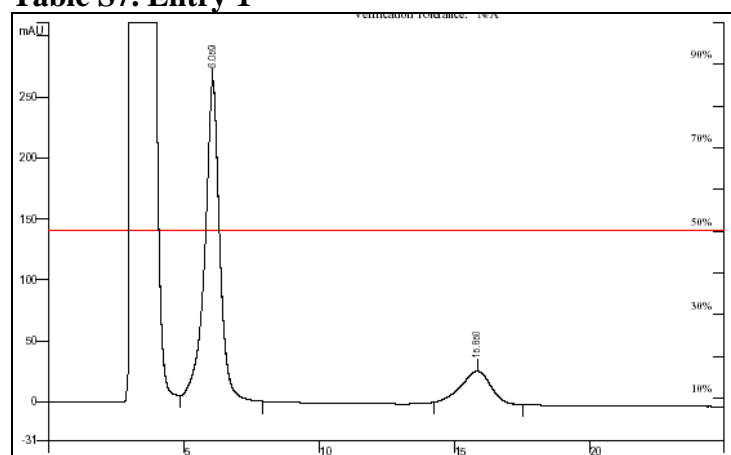

| Peak No | Result () | Ret. Time (min) | Area (counts)   | Width 1/2 (sec)  |
|---------|-----------|-----------------|-----------------|------------------|
| 1       | 82.8964   | 6.059           | 97601960        | 30.8             |
| 2       | 17.1036   | 15.850          | 20137786        | 66.1             |
|         |           |                 | <b>100.0000</b> | <b>117739744</b> |

**Table S7. Entry 2**

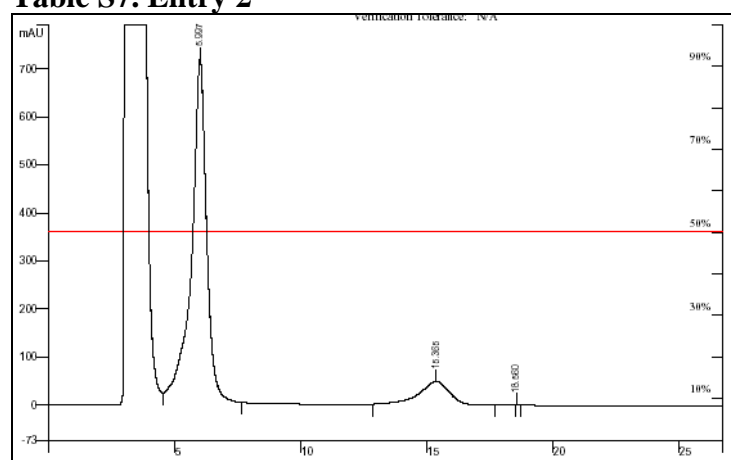

| Peak No | Result () | Ret. Time (min) | Area (counts)   | Width 1/2 (sec)  |
|---------|-----------|-----------------|-----------------|------------------|
| 1       | 87.5151   | 5.997           | 281221600       | 31.0             |
| 2       | 12.4845   | 15.365          | 40117712        | 68.1             |
| 3       | 0.0004    | 18.560          | 1406            | 3.6              |
|         |           |                 | <b>100.0000</b> | <b>321340736</b> |

**Table S7. Entry 3**

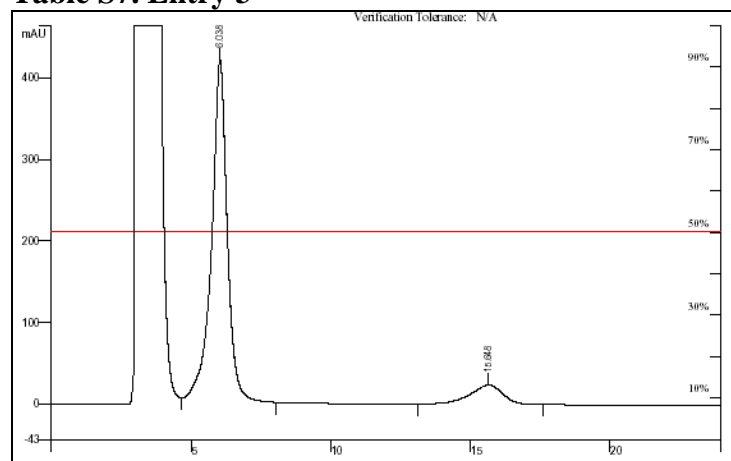

| Peak No | Result () | Ret. Time (min) | Area (counts)   | Width 1/2 (sec)  |
|---------|-----------|-----------------|-----------------|------------------|
| 1       | 89.2935   | 6.038           | 161039568       | 31.4             |
| 2       | 10.7065   | 15.648          | 19309038        | 69.3             |
|         |           |                 | <b>100.0000</b> | <b>180348608</b> |

**Table S7. Entry 4**

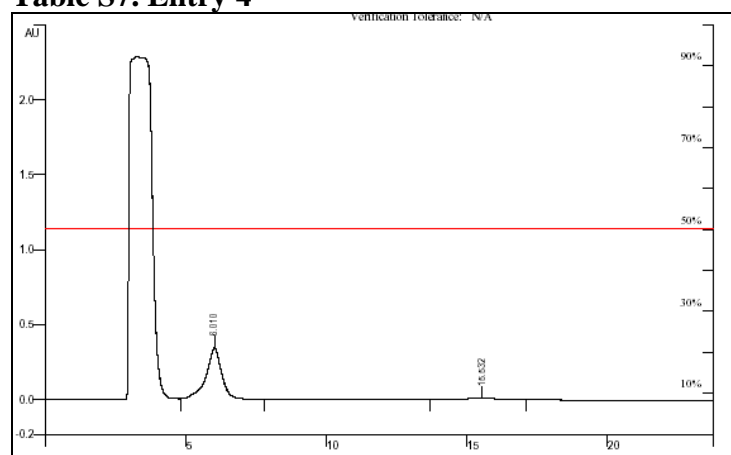

| Peak No | Result () | Ret. Time (min) | Area (counts)   | Width 1/2 (sec)  |
|---------|-----------|-----------------|-----------------|------------------|
| 1       | 93.6221   | 6.010           | 129926328       | 30.8             |
| 2       | 6.3779    | 15.532          | 8851057         | 64.7             |
|         |           |                 | <b>100.0000</b> | <b>138777392</b> |

**Table S7. Entry 5**

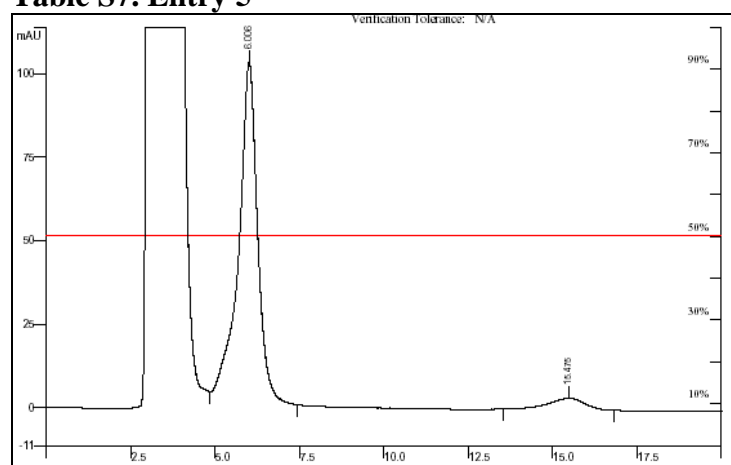

| Peak No | Result () | Ret. Time (min) | Area (counts)   | Width 1/2 (sec) |
|---------|-----------|-----------------|-----------------|-----------------|
| 1       | 93.5760   | 6.006           | 38017184        | 30.0            |
| 2       | 6.4240    | 15.475          | 2609886         | 63.2            |
|         |           |                 | <b>100.0000</b> | <b>40627072</b> |

**Table S7. Entry 6**

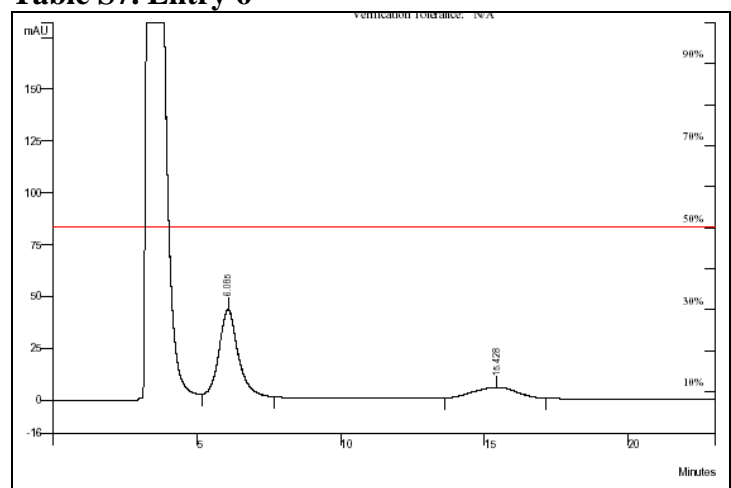

| Peak No | Result () | Ret. Time (min) | Area (counts)   | Width 1/2 (sec) |
|---------|-----------|-----------------|-----------------|-----------------|
| 1       | 78.0949   | 6.085           | 18655146        | 40.8            |
| 2       | 21.9051   | 15.428          | 5232650         | 93.7            |
|         |           |                 | <b>100.0000</b> | <b>23887796</b> |

**Table S7. Entry 7**

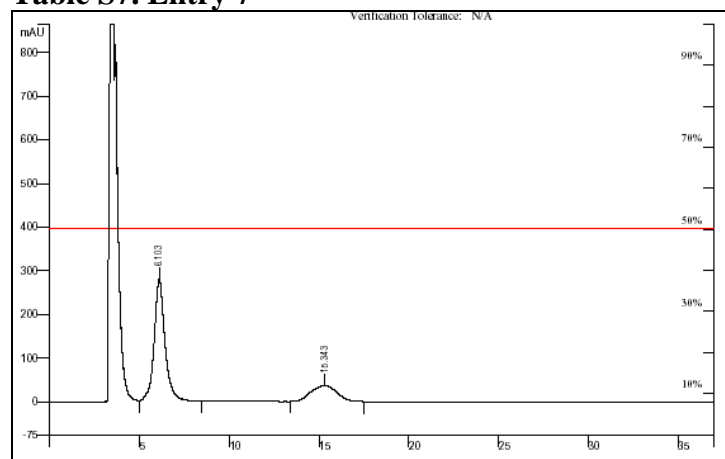

| Peak No | Result () | Ret. Time (min) | Area (counts) | Width 1/2 (sec) |
|---------|-----------|-----------------|---------------|-----------------|
| 1       | 75.8770   | 6.103           | 115716344     | 36.0            |
| 2       | 24.1230   | 15.343          | 36788896      | 92.6            |
|         |           | 100.0000        | 152505248     |                 |

**Table S8. Concentration and temperature effect on enantioselectivity in the conjugate addition of benzene thiol to **9** using the catalyst **4a** (Figure 4)**

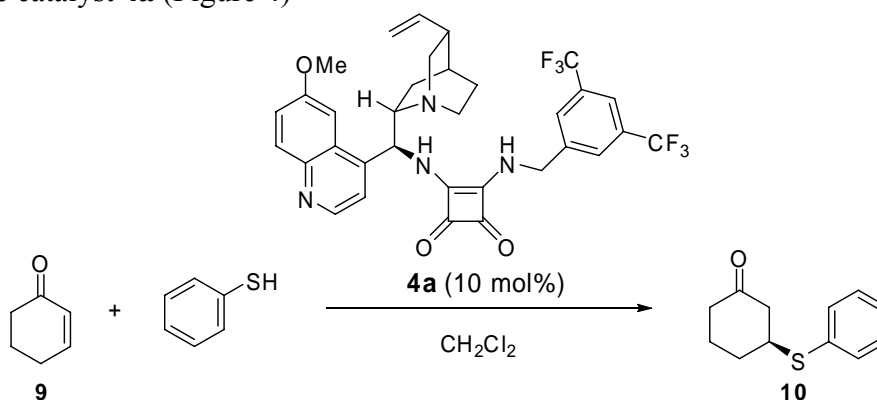

| Entry | Concentration                                    | T (°C) | Time (h) | Yield (%) <sup>[b]</sup> | % ee <sup>[c]</sup> |
|-------|--------------------------------------------------|--------|----------|--------------------------|---------------------|
| 1     | CH <sub>2</sub> Cl <sub>2</sub> (5 mL, 0.1 M)    | rt     | 5        | 82                       | 60                  |
| 2     | CH <sub>2</sub> Cl <sub>2</sub> (10 mL, 0.05 M)  | rt     | 8        | 81                       | 68                  |
| 3     | CH <sub>2</sub> Cl <sub>2</sub> (20 mL, 0.025 M) | rt     | 16       | 80                       | 69                  |

<sup>[a]</sup> Reactions were carried out with **9** (0.5 mmol), benzene thiol (0.6 mmol) and catalysts **4a** (10 mol%, 0.05 mmol) in CH<sub>2</sub>Cl<sub>2</sub>. <sup>[b]</sup> Isolated yields after chromatographic purification. <sup>[c]</sup> Ee value of **10** was determined by HPLC.

### HPLC spectra for Table S8.

The ee value was determined by the HPLC analysis (Chiralpak AS, Hexanes : IPA (1 : 1), 1 mL/min, UV detection at 220 nm,  $t(\text{major}) = 6.09 \text{ min}$ ,  $t(\text{minor}) = 15.36 \text{ min}$ ).

#### Table S8. Entry 1

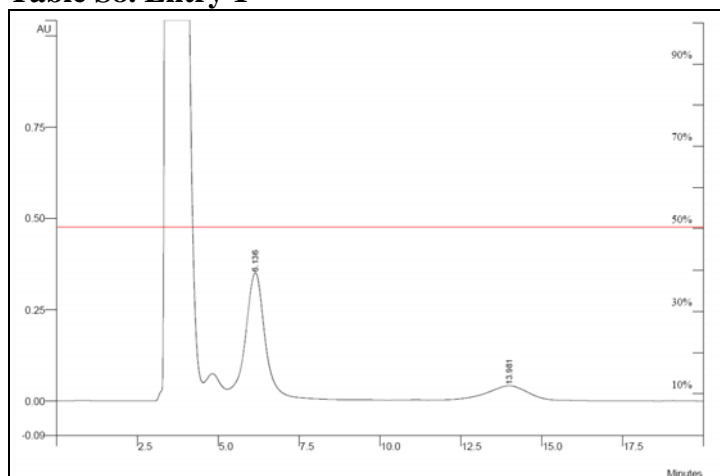

| Peak No | Result () | Ret. Time (min) | Area (counts)   | Width 1/2 (sec)  |
|---------|-----------|-----------------|-----------------|------------------|
| 1       | 80.4444   | 6.136           | 125487144       | 33.8             |
| 2       | 19.5556   | 13.981          | 30505194        | 73.1             |
|         |           |                 | <b>100.0000</b> | <b>155992336</b> |

#### Table S8. Entry 2

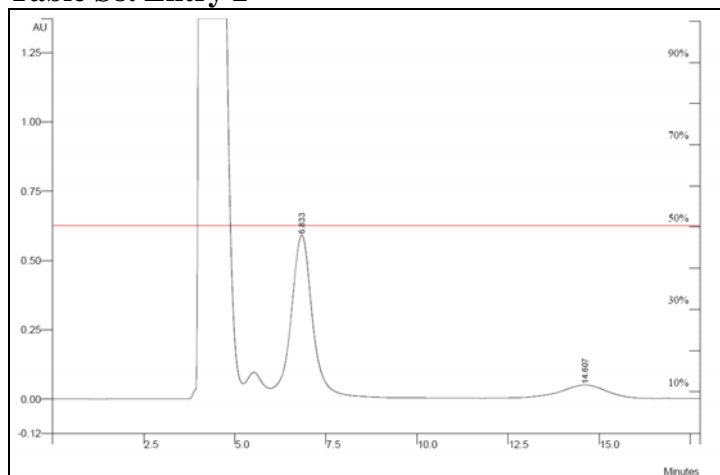

| Peak No | Result () | Ret. Time (min) | Area (counts)   | Width 1/2 (sec)  |
|---------|-----------|-----------------|-----------------|------------------|
| 1       | 84.0635   | 6.833           | 211715664       | 33.6             |
| 2       | 15.9365   | 14.607          | 40136268        | 75.1             |
|         |           |                 | <b>100.0000</b> | <b>251851936</b> |

#### Table S8. Entry 3

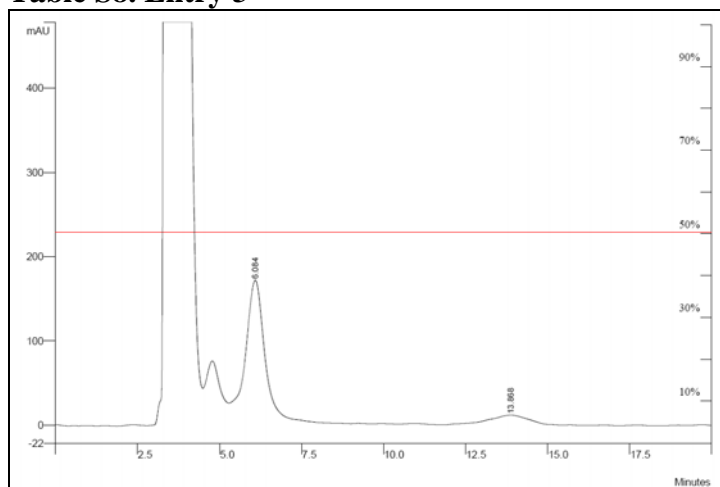

| Peak No | Result () | Ret. Time (min) | Area (counts)   | Width 1/2 (sec) |
|---------|-----------|-----------------|-----------------|-----------------|
| 1       | 84.3208   | 6.084           | 53895040        | 30.5            |
| 2       | 15.6792   | 13.868          | 10021584        | 75.3            |
|         |           |                 | <b>100.0000</b> | <b>63916624</b> |

## 8. DOSY data for Table 1

The  $^{19}\text{F}$  DOSY experiment was conducted by using a stimulated echo sequence with self-compensating gradient schemes (convection corrected), a spectral width of 62980 Hz. d1 value was 5s and diffusion gradient length was 3ms and diffusion delay was 50.0 ms. (1000 - 25000, 16 gradient). The baselines of all of the spectra were corrected prior to data processing. The data were processed after the Fourier transformation of each FID with VNMRJ to obtain the chemical shift as the x-axis along with the calculated diffusion coefficient as the y-axis. All of the diffusion coefficient values,  $D$ , were corrected based on the  $D$  value of  $\text{CFCl}_3$  (0.1%, v/v) as an internal standard.

Table S9. Diffusion coefficient of **3a** at different concentration (Table 1)

| M<br>( $\text{CDCl}_3$ ) | Relative mol% of catalyst<br>(mol%) | $D$ ( $10^{-10} \text{ ms}^{-1}$ ) |          |                               |
|--------------------------|-------------------------------------|------------------------------------|----------|-------------------------------|
|                          |                                     | $\text{CFCl}_3$                    | <b>I</b> | <b>I</b> <sub>corrected</sub> |
| 0.2                      | 100                                 | 13.3009                            | 2.7990   | 3.97                          |
| 0.1                      | 50                                  | 15.8880                            | 3.8116   | 4.52                          |
| 0.02                     | 10                                  | 16.7638                            | 4.8645   | 5.47                          |
| 0.01                     | 5                                   | 17.1697                            | 5.1184   | 5.62                          |
| 0.002                    | 1                                   | 17.997                             | 5.582    | 5.85                          |
| 0.001                    | 0.5                                 | 18.8613                            | 5.8654   |                               |

### DOSY spectrum for catalyst **3a** in 0.2 M concentration

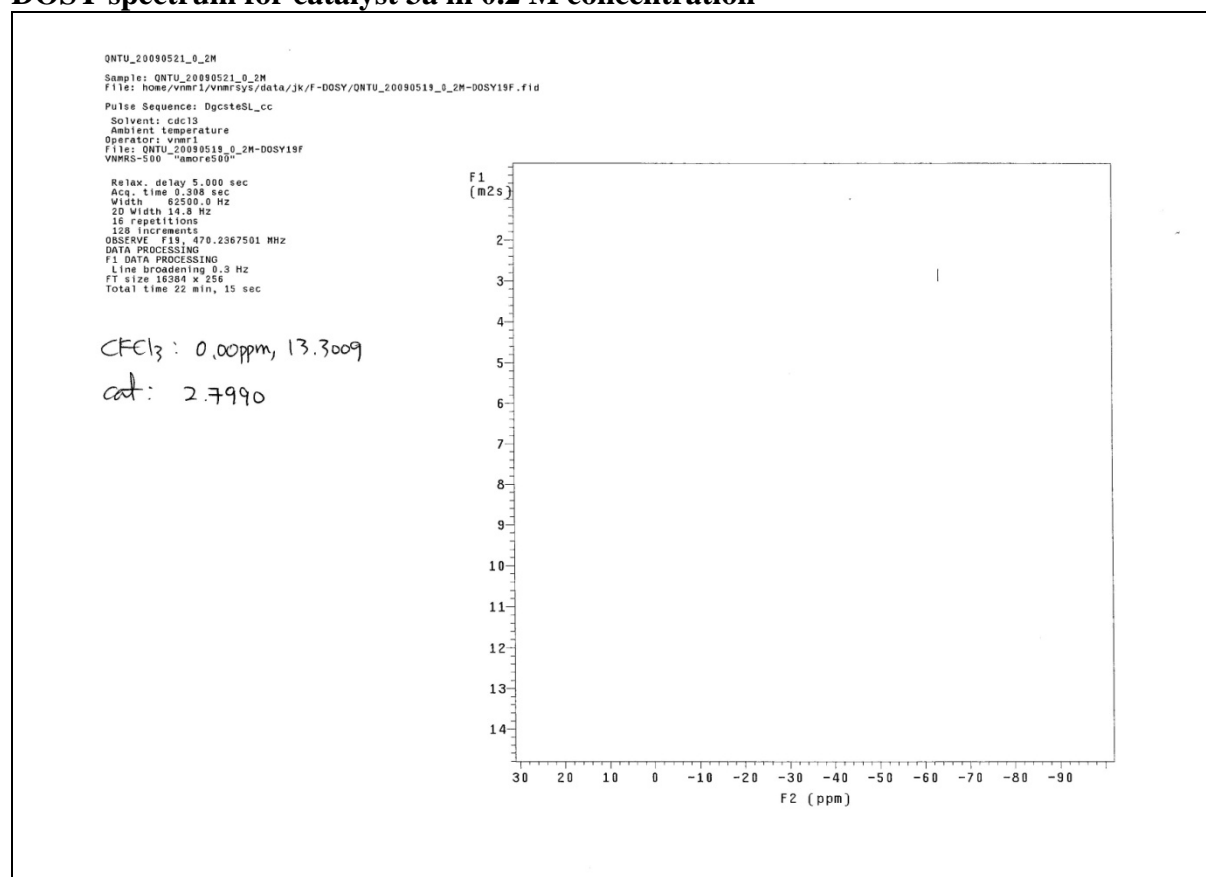

### DOSY spectrum for catalyst 3a in 0.1 M concentration

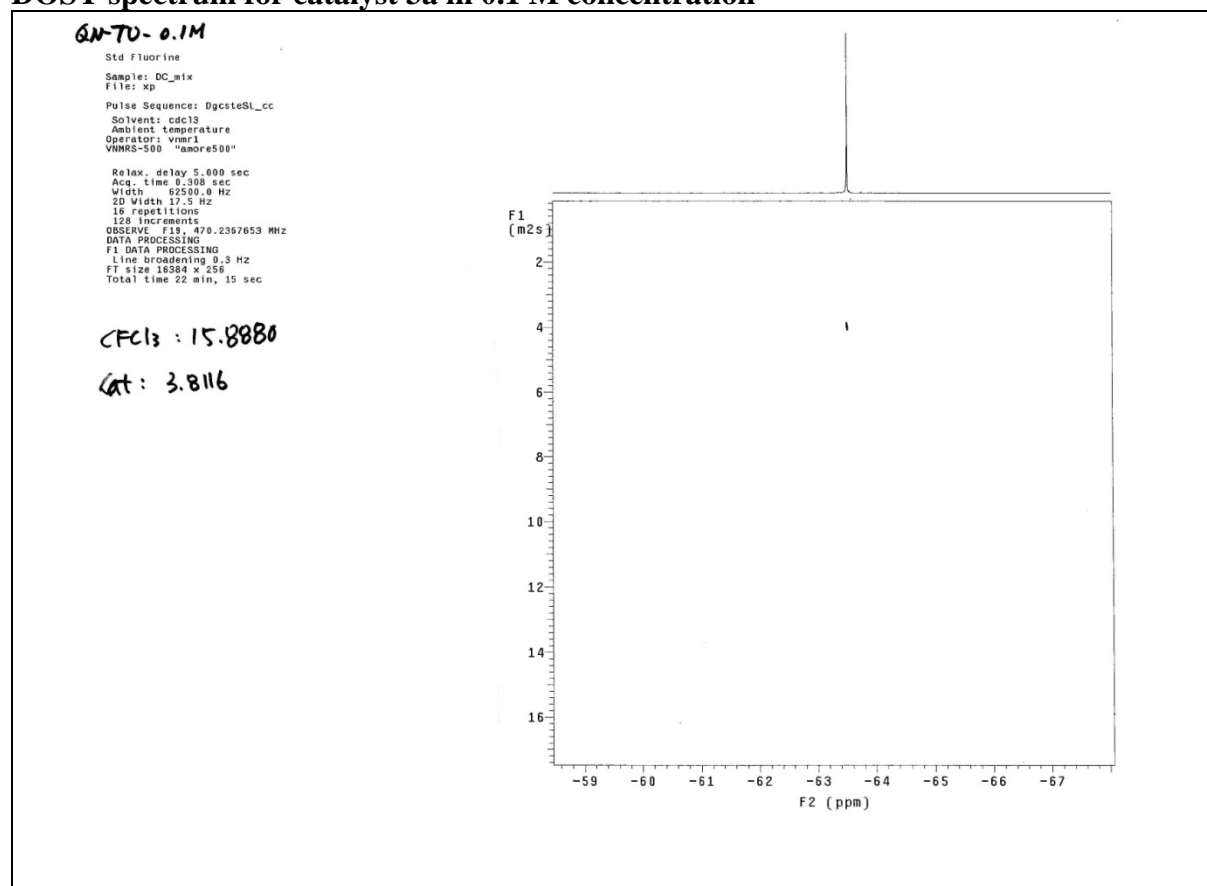

### DOSY spectrum for catalyst 3a in 0.02 M concentration

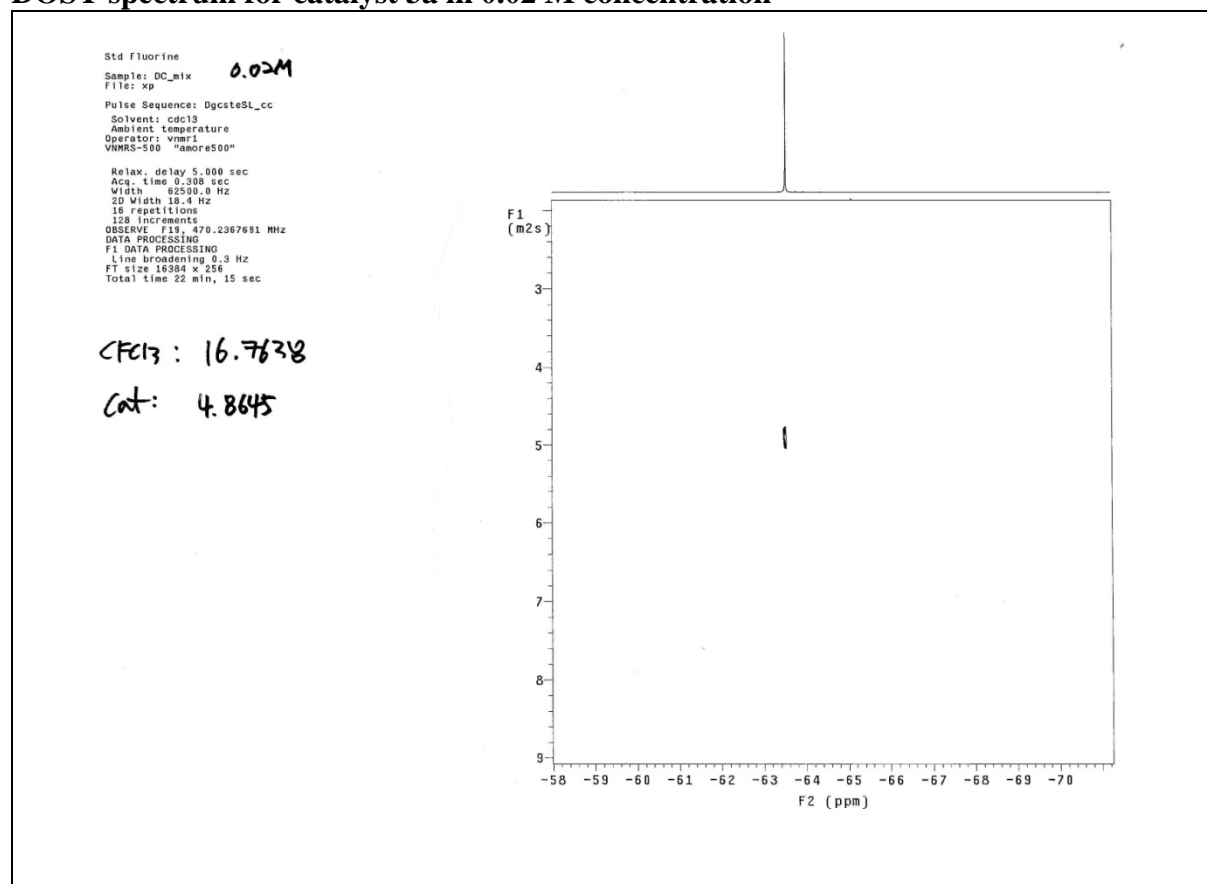

### DOSY spectrum for catalyst 3a in 0.01 M concentration

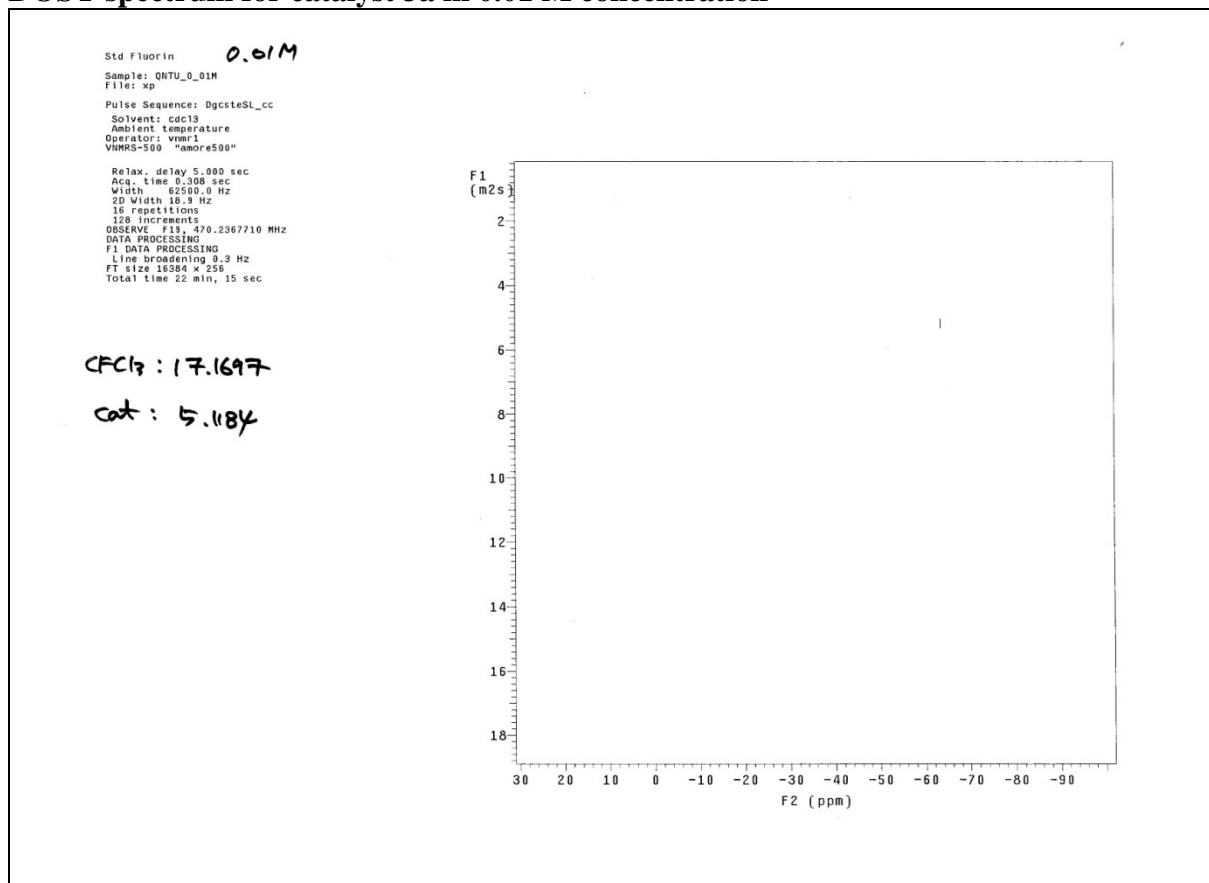

### DOSY spectrum for catalyst 3a in 0.002 M concentration

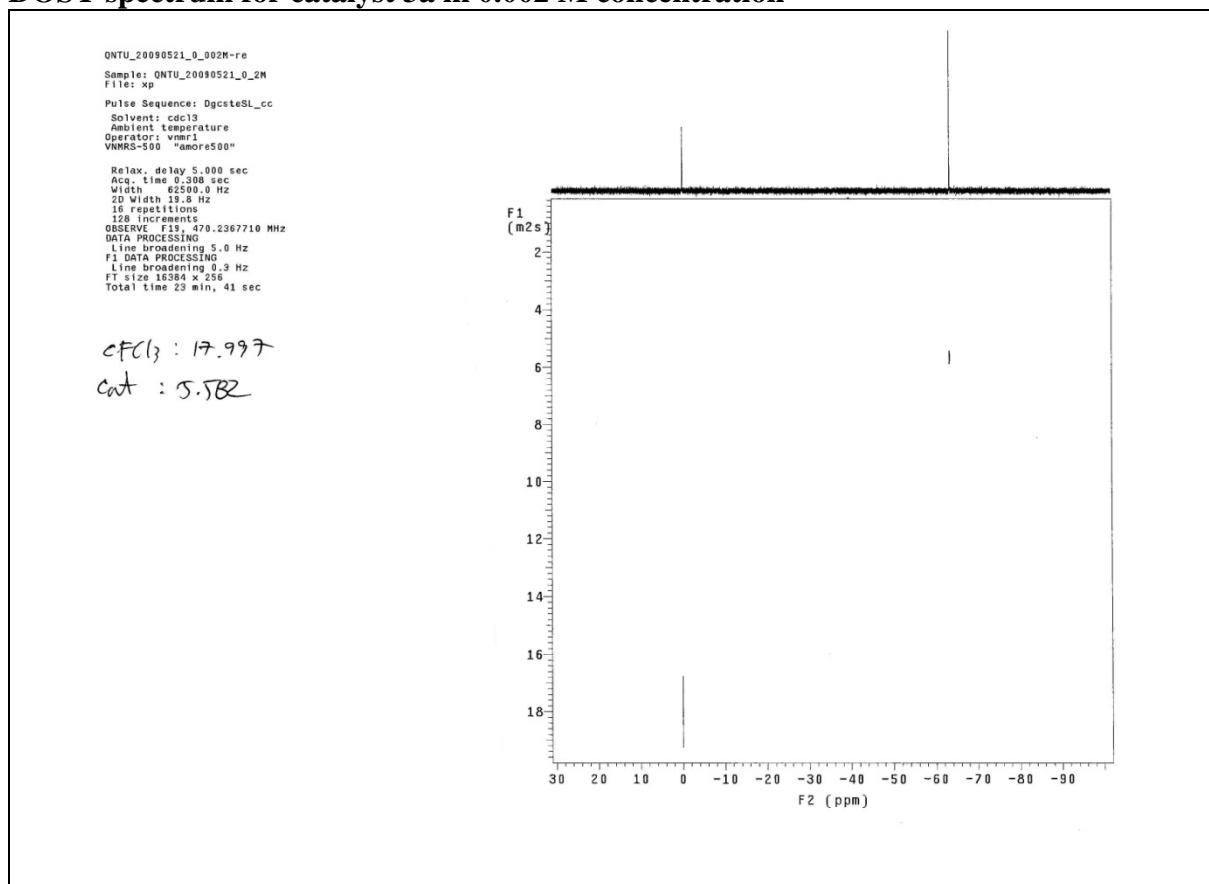



### DOSY spectrum for catalyst 3a in 0.001 M concentration

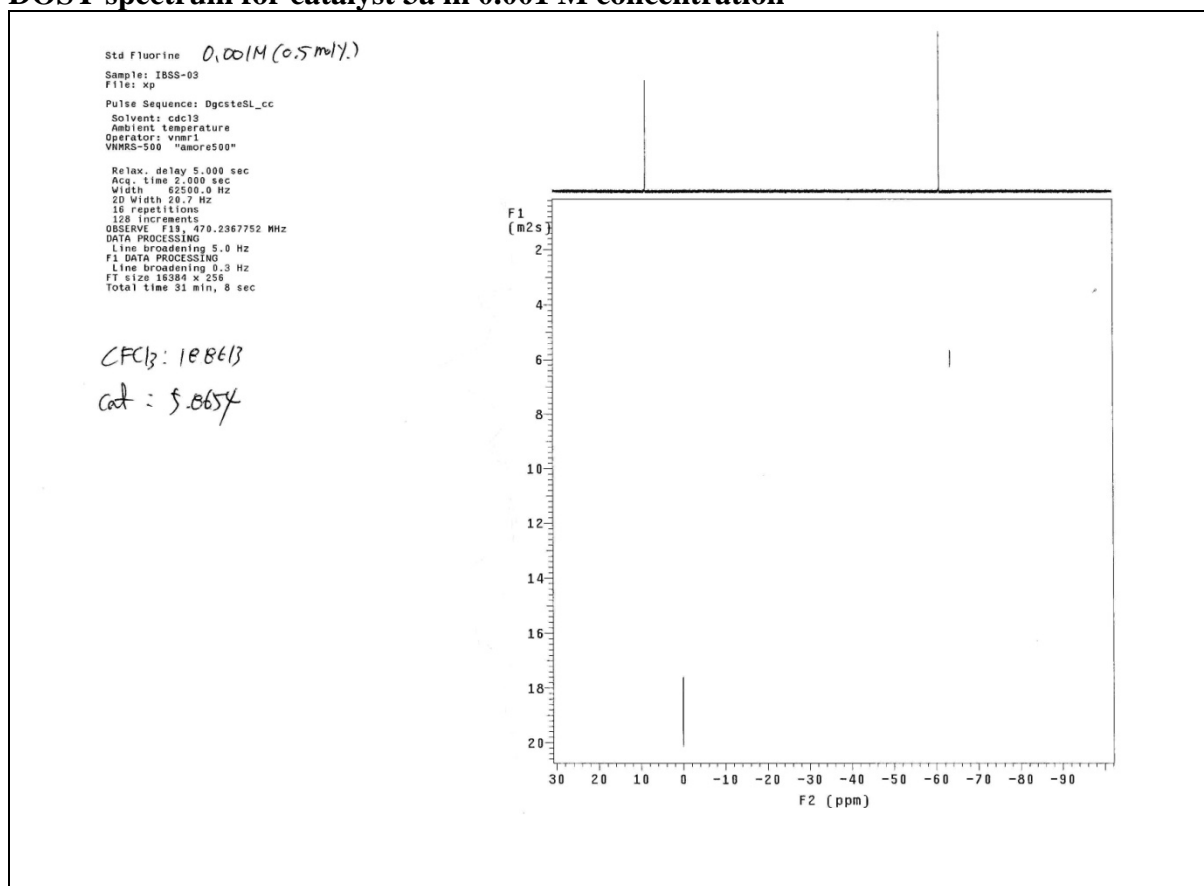

Table S10. Diffusion coefficient of **4a** at different concentration (Table 1)

| M<br>(CDCl <sub>3</sub> ) | Relative mol% of catalyst<br>(mol%) | $D$ ( $10^{-10}$ ms $^{-1}$ ) |          |                               |
|---------------------------|-------------------------------------|-------------------------------|----------|-------------------------------|
|                           |                                     | CFCl <sub>3</sub>             | <b>I</b> | <b>I</b> <sub>corrected</sub> |
| 0.020                     | 10                                  | 16.36                         | 2.901    | 3.04                          |
| 0.010                     | 5                                   | 16.19                         | 3.490    | 3.69                          |
| 0.002                     | 1                                   | 16.991                        | 4.718    | 4.82                          |
| 0.001                     | 0.5                                 | 17.139                        | 4.856    | 4.85                          |

**DOSY spectrum for catalyst 4a in 0.02 M concentration**

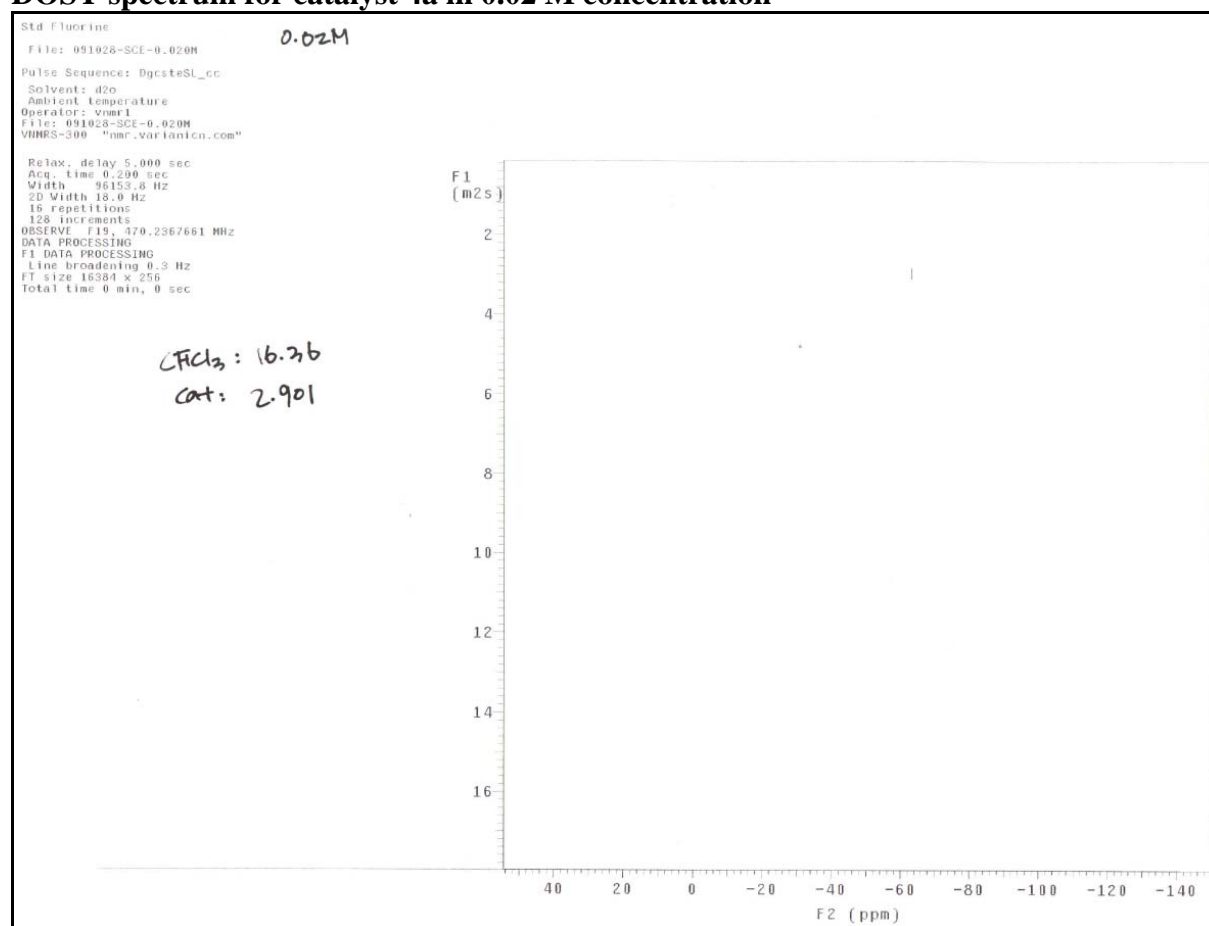

### DOSY spectrum for catalyst 4a in 0.01 M concentration

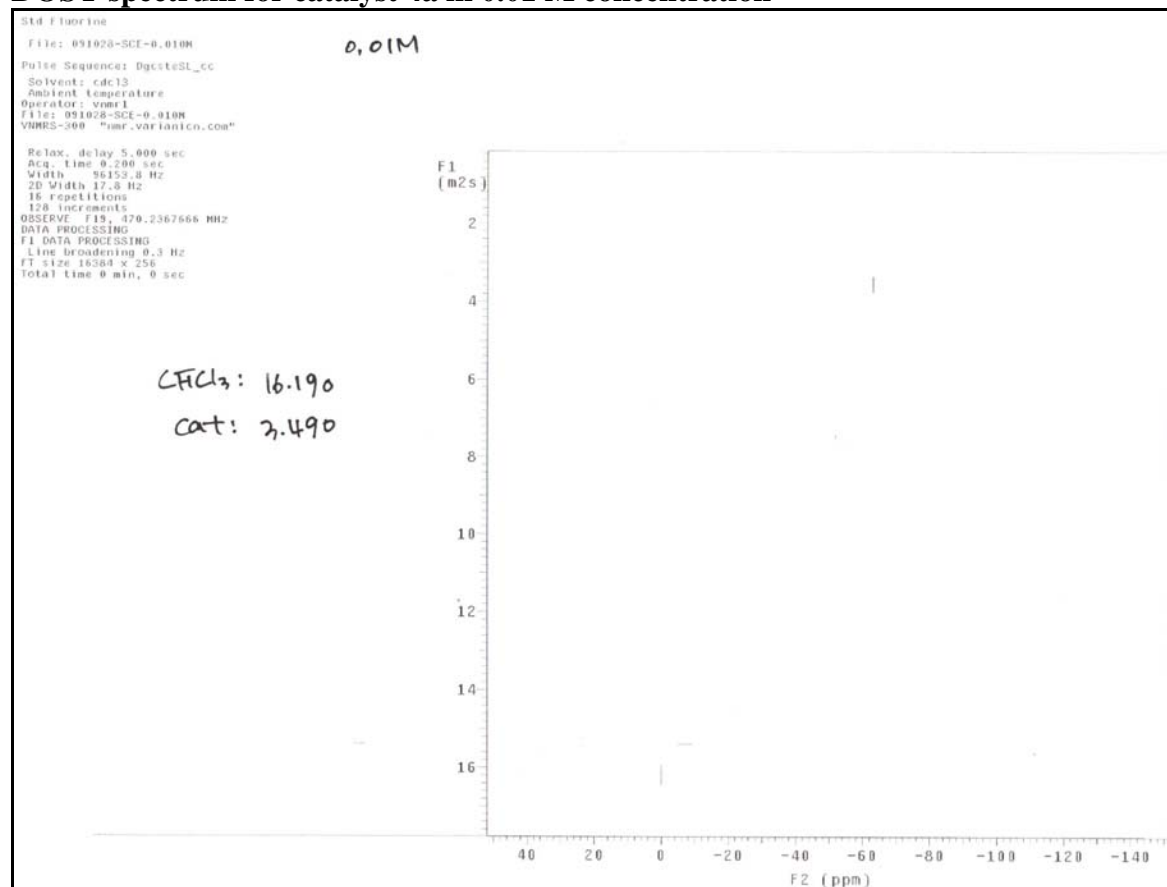

### DOSY spectrum for catalyst 4a in 0.002 M concentration

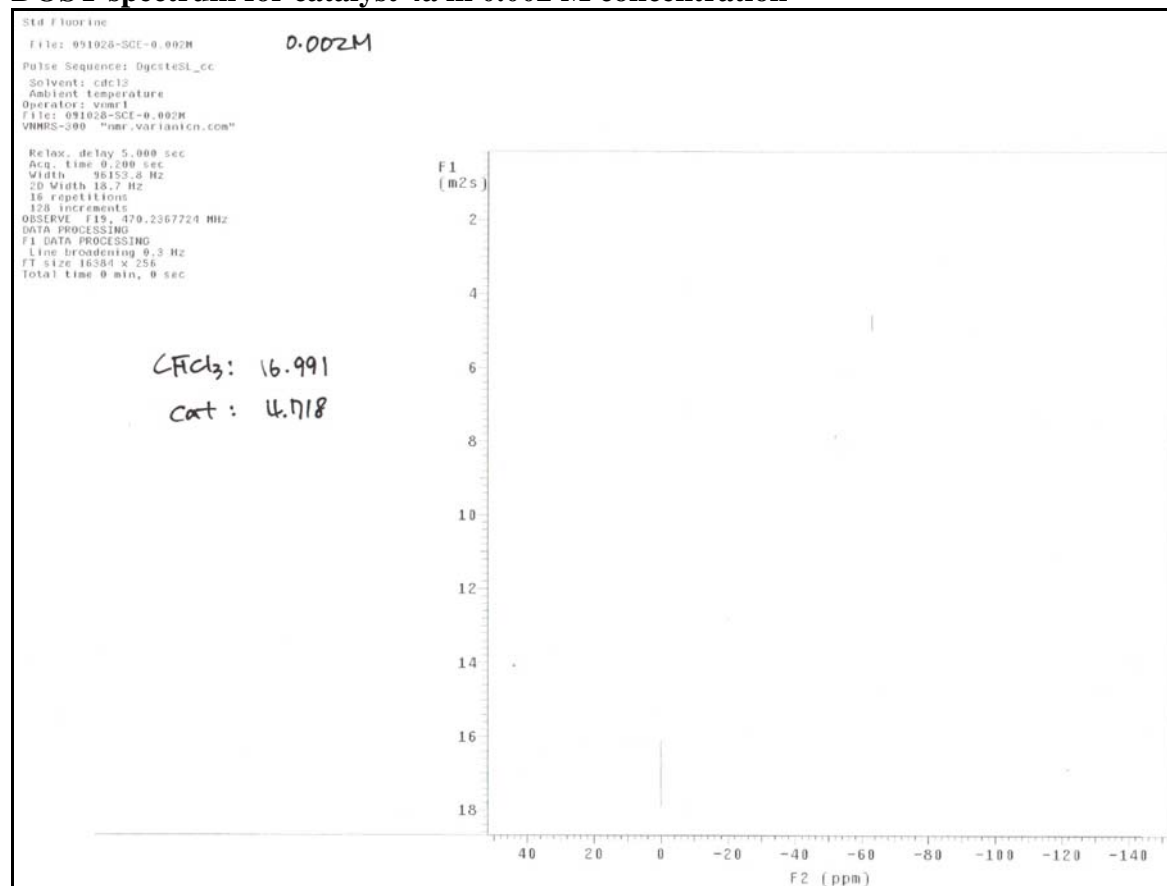

## DOSY spectrum for catalyst 4a in 0.001 M concentration

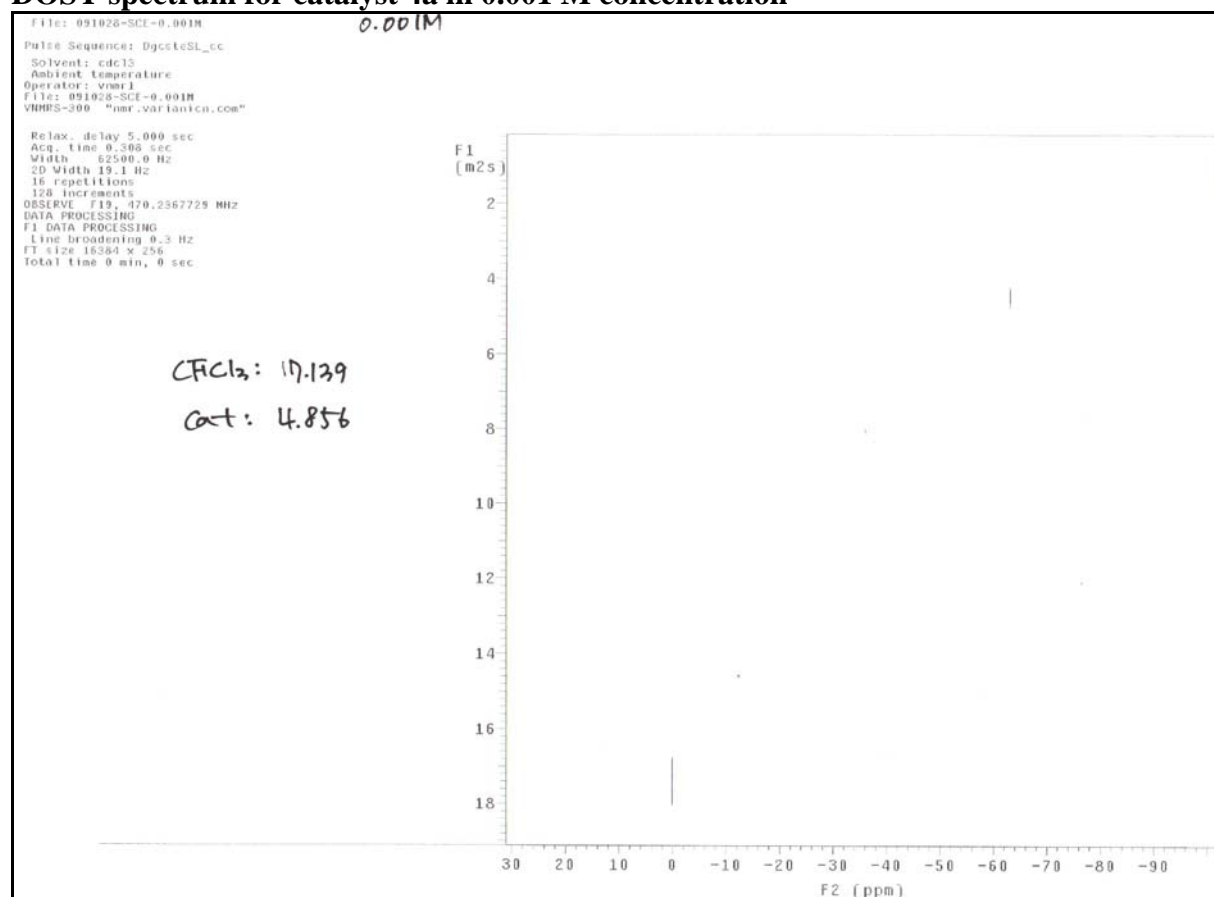

## 9. HPLC spectra for Table 1.

Table S11. Asymmetric conjugate addition of thiol **11** to cyclohexenone **9** (Figure 4)

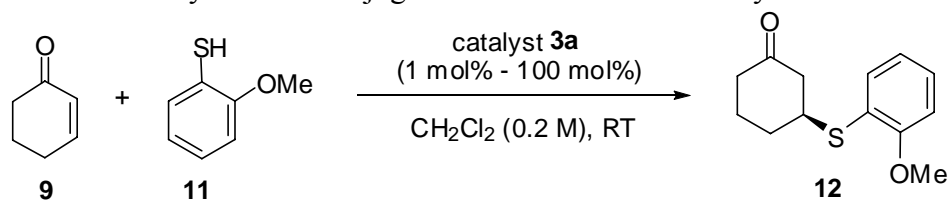

| Entry | Catalyst (mol%) | Time (h) | Yield(%) <sup>[b]</sup> | ee(%) <sup>[c]</sup> |
|-------|-----------------|----------|-------------------------|----------------------|
| 1     | 100 mol%        | 1.5      | 87                      | 61                   |
| 2     | 50 mol%         | 3        | 84                      | 71                   |
| 3     | 30 mol%         | 5        | 88                      | 76                   |
| 4     | 20 mol%         | 8        | 84                      | 81                   |
| 5     | 10 mol%         | 16       | 89                      | 86                   |
| 6     | 5 mol%          | 25       | 85                      | 90                   |
| 7     | 2.5 mol%        | 34       | 89                      | 92                   |
| 8     | 1 mol%          | 46       | 87                      | 94                   |

<sup>a</sup> Reactions were carried out on a 0.5 mmol scale in CH<sub>2</sub>Cl<sub>2</sub> (2.5 mL) at room temperature.

### HPLC spectra for Table S11.

The ee value was determined by the HPLC analysis (Chiralpak AS, Hexanes : IPA (1 : 1), 1 mL/min, UV detection at 220 nm,  $t(\text{major}) = 6.75$  min,  $t(\text{minor}) = 12.73$  min).

**Table S11. Entry 1**

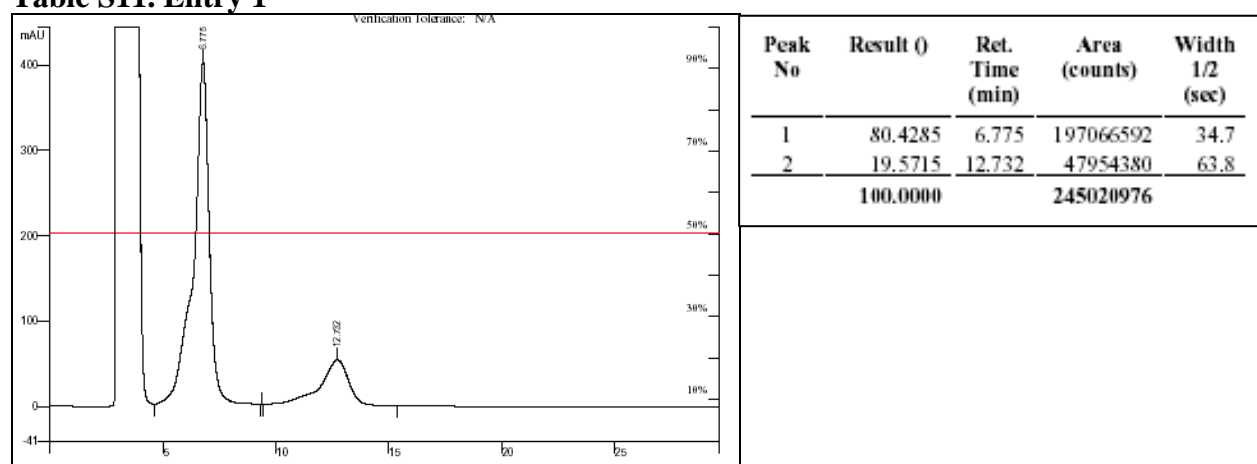

**Table S11. Entry 2**

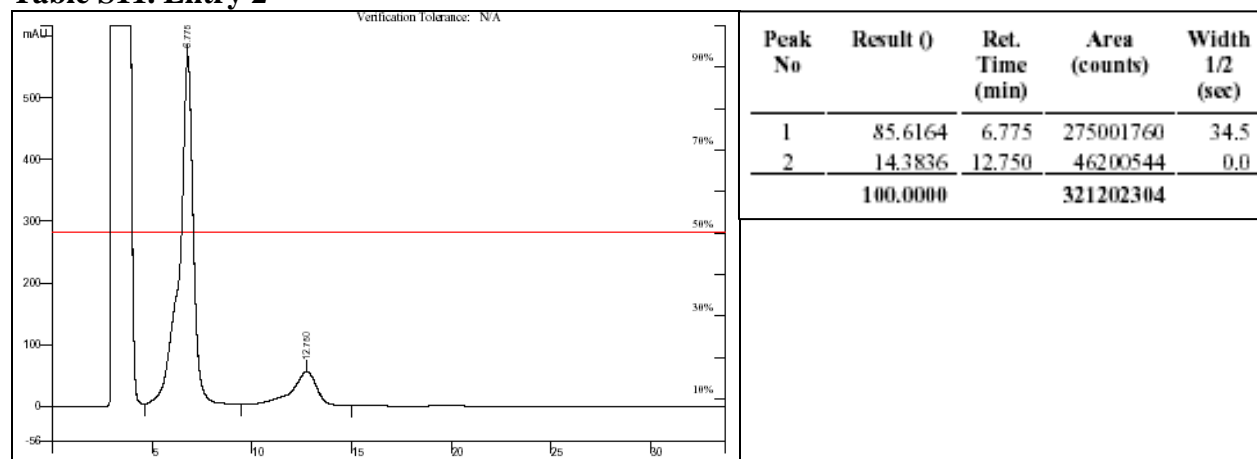

**Table S11. Entry 3**

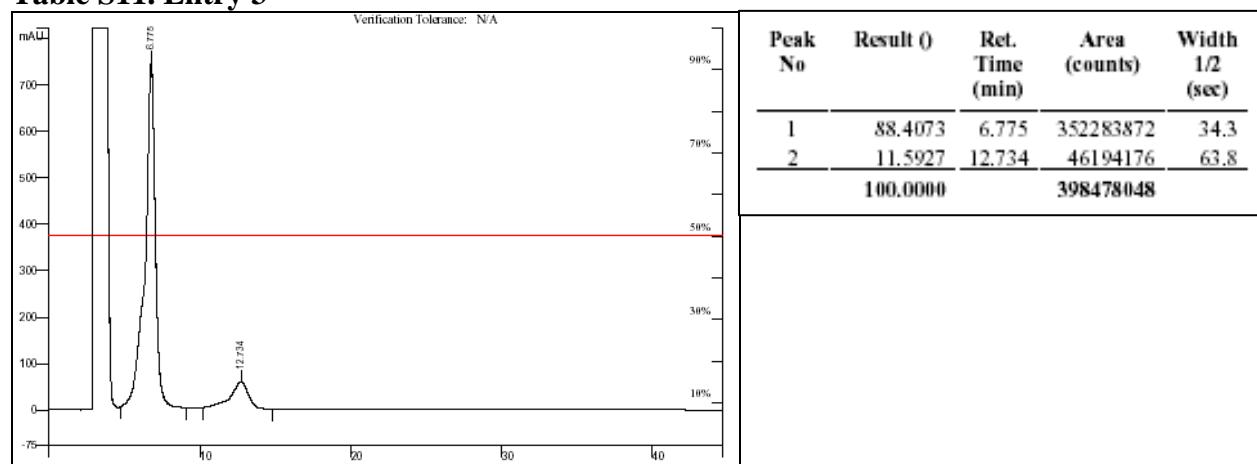

**Table S11. Entry 4**

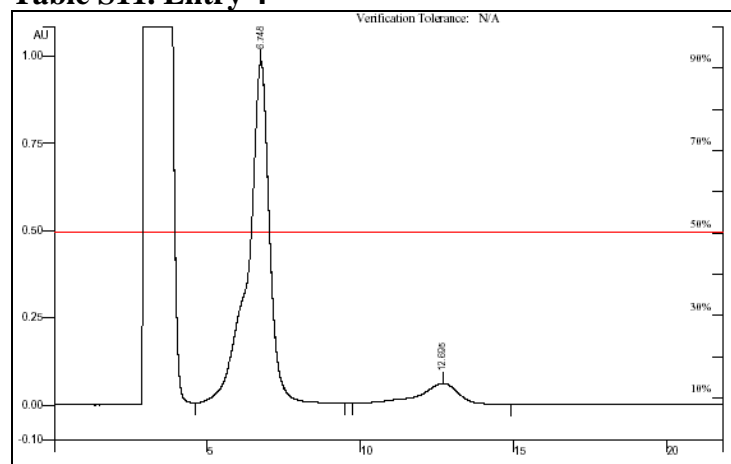

| Peak No | Result () | Ret. Time (min) | Area (counts)   | Width 1/2 (sec)  |
|---------|-----------|-----------------|-----------------|------------------|
| 1       | 90.5120   | 6.748           | 475025024       | 34.8             |
| 2       | 9.4880    | 12.695          | 49795004        | 65.0             |
|         |           |                 | <b>100.0000</b> | <b>524820032</b> |

**Table S11. Entry 5**

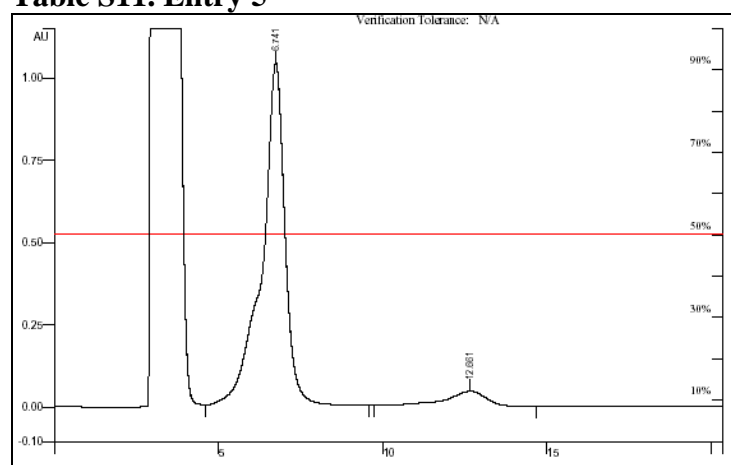

| Peak No | Result () | Ret. Time (min) | Area (counts)   | Width 1/2 (sec)  |
|---------|-----------|-----------------|-----------------|------------------|
| 1       | 93.0930   | 6.741           | 504594240       | 34.9             |
| 2       | 6.9070    | 12.661          | 37438180        | 63.7             |
|         |           |                 | <b>100.0000</b> | <b>542032448</b> |

**Table S11. Entry 6**

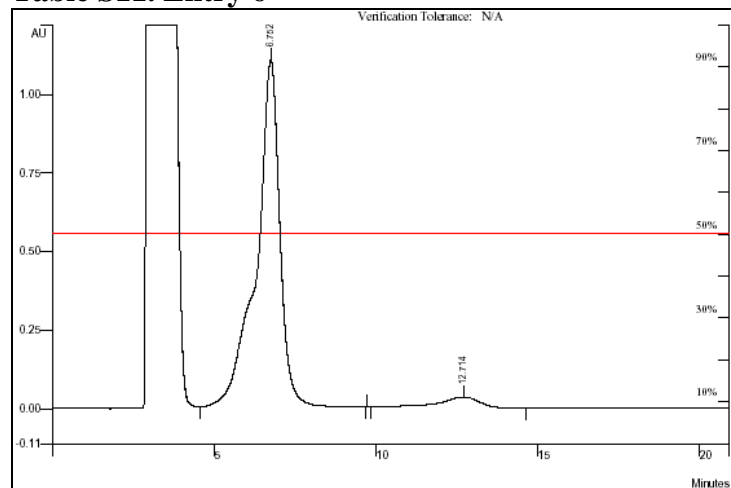

| Peak No | Result () | Ret. Time (min) | Area (counts)   | Width 1/2 (sec)  |
|---------|-----------|-----------------|-----------------|------------------|
| 1       | 95.0741   | 6.752           | 561905344       | 35.6             |
| 2       | 4.9259    | 12.714          | 29112804        | 0.0              |
|         |           |                 | <b>100.0000</b> | <b>591018176</b> |

**Table S11. Entry 7**

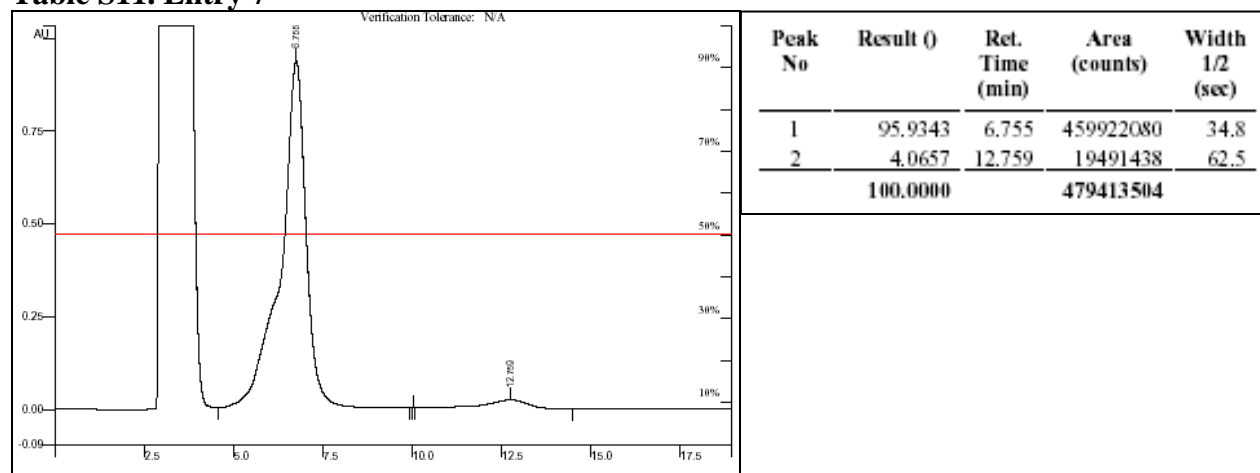

**Table S11. Entry 8**

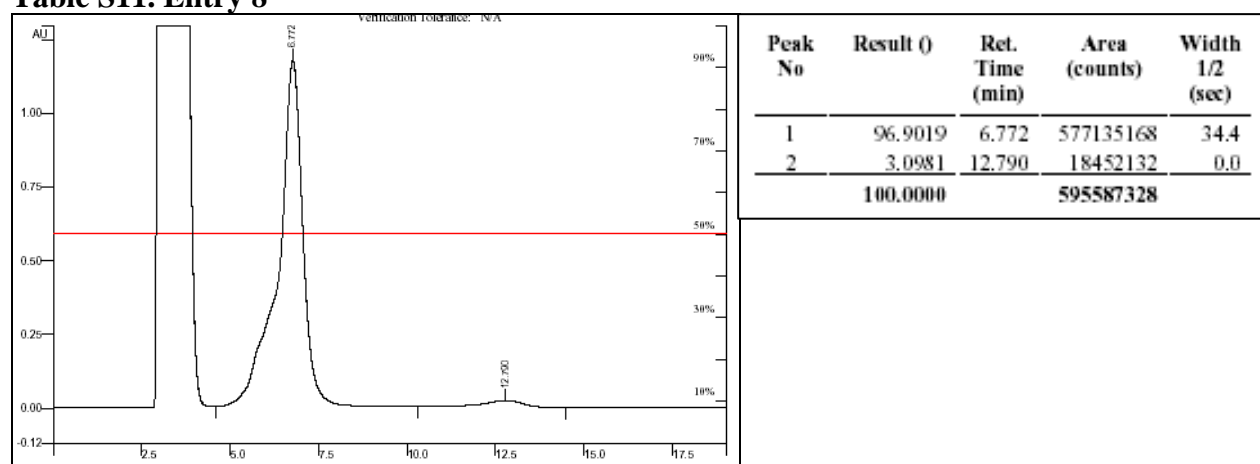

**Table S12. Concentration effect on enantioselectivity in the conjugate addition of benzene thiol **11** to **9** using the catalyst **4a** (Table 1)<sup>a</sup>**

| Entry | Catalyst    | Time (h) | Yield (%) | % ee |
|-------|-------------|----------|-----------|------|
| 1     | (10 mol%)   | 2        | 89        | 67.2 |
| 2     | (5 mol%)    | 4        | 87        | 79.2 |
| 3     | (2 mol%)    | 11       | 82        | 84.4 |
| 3     | (1 mol%)    | 17       | 85        | 90.1 |
| 4     | (0.5 mol%)  | 31       | 87        | 91.3 |
| 5     | (0.25 mol%) | 46       | 80        | 92.7 |

<sup>a</sup> Reactions were carried out at 0.5 mmol scale in 2.5 mL CH<sub>2</sub>Cl<sub>2</sub> in room temperature at various catalyst concentrations

### HPLC spectra for Table S12.

The ee value was determined by the HPLC analysis (Chiralpak AS, Hexanes : IPA (8 : 2), 1 mL/min, UV detection at 220 nm,  $t(\text{major}) = 10.3 \text{ min}$ ,  $t(\text{minor}) = 20.5 \text{ min}$ ).

#### Table S12. Entry 1

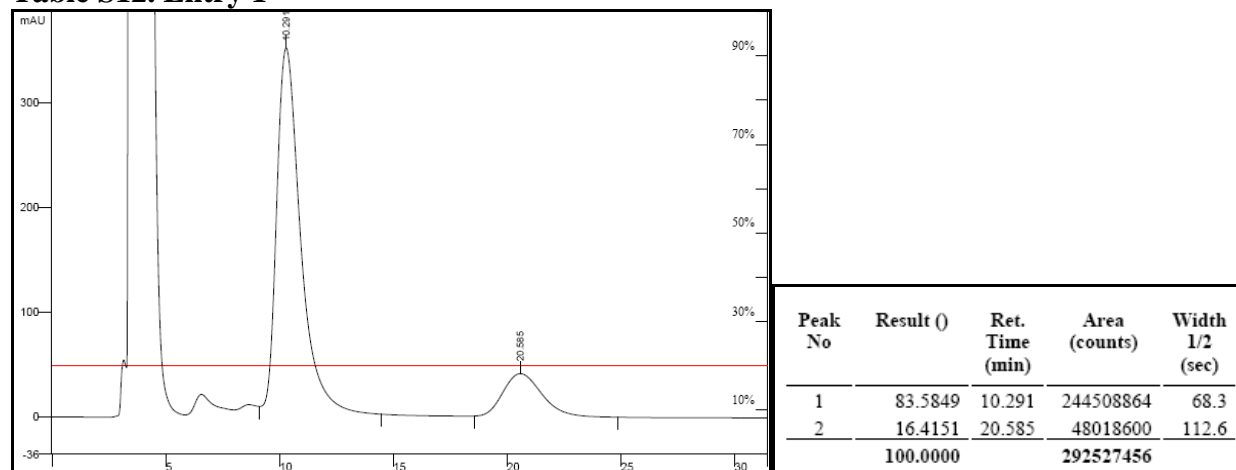

#### Table S12. Entry 2

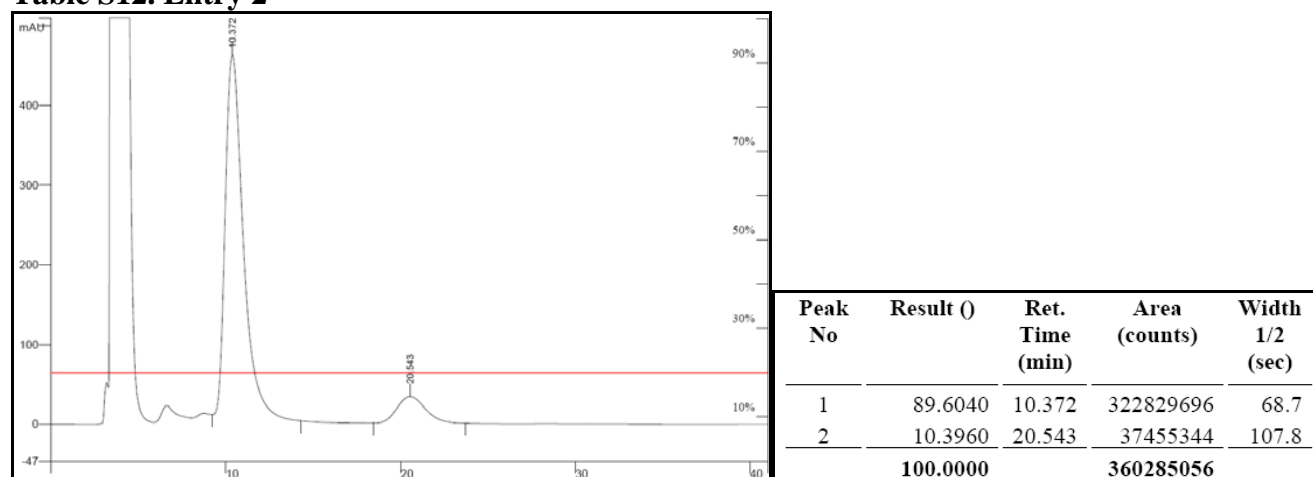

#### Table S12. Entry 3

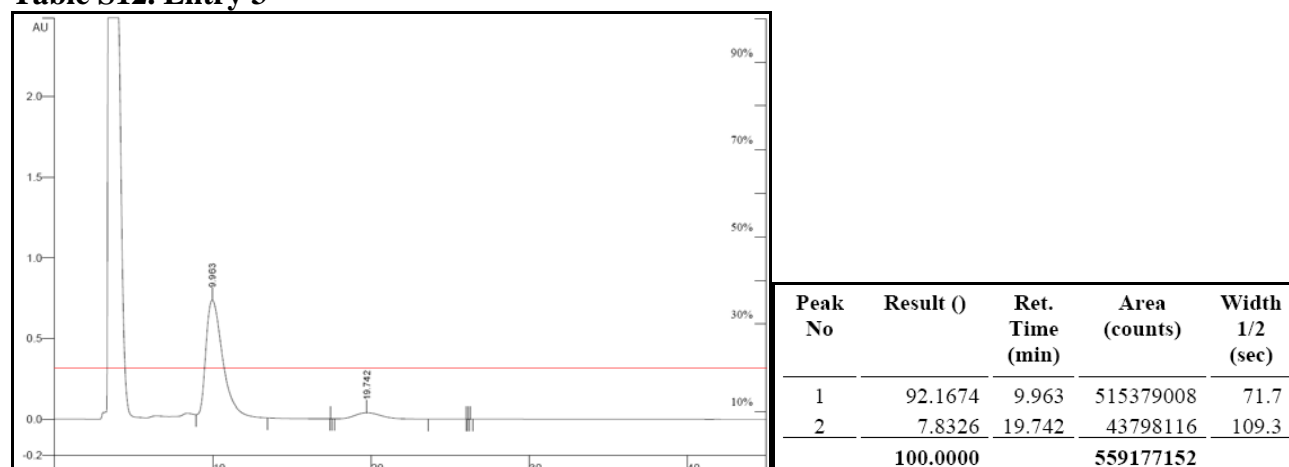



**Table S12. Entry 4**

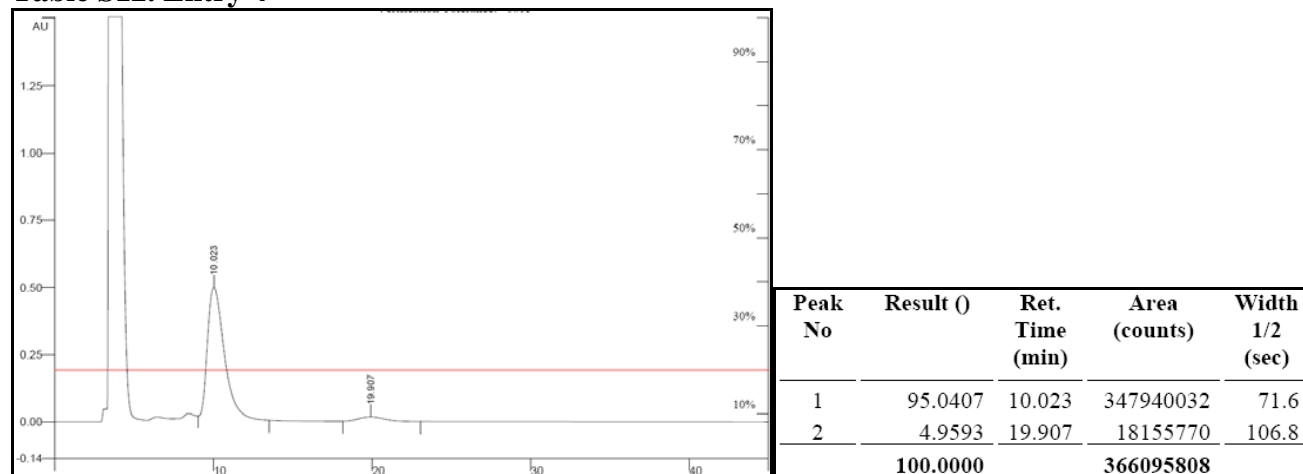

**Table S12. Entry 5**

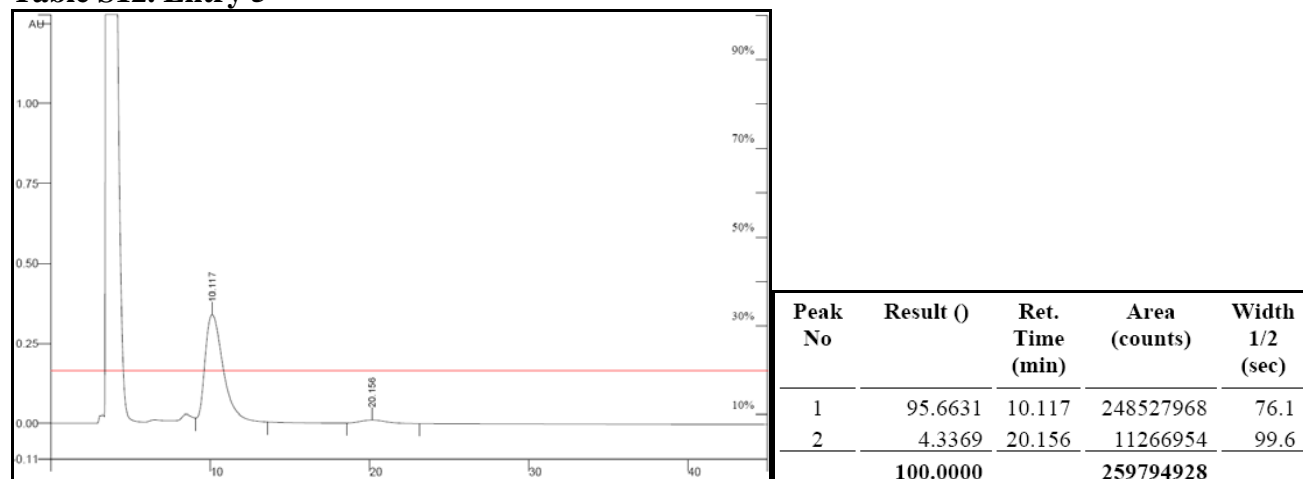

**Table S12. Entry 6**

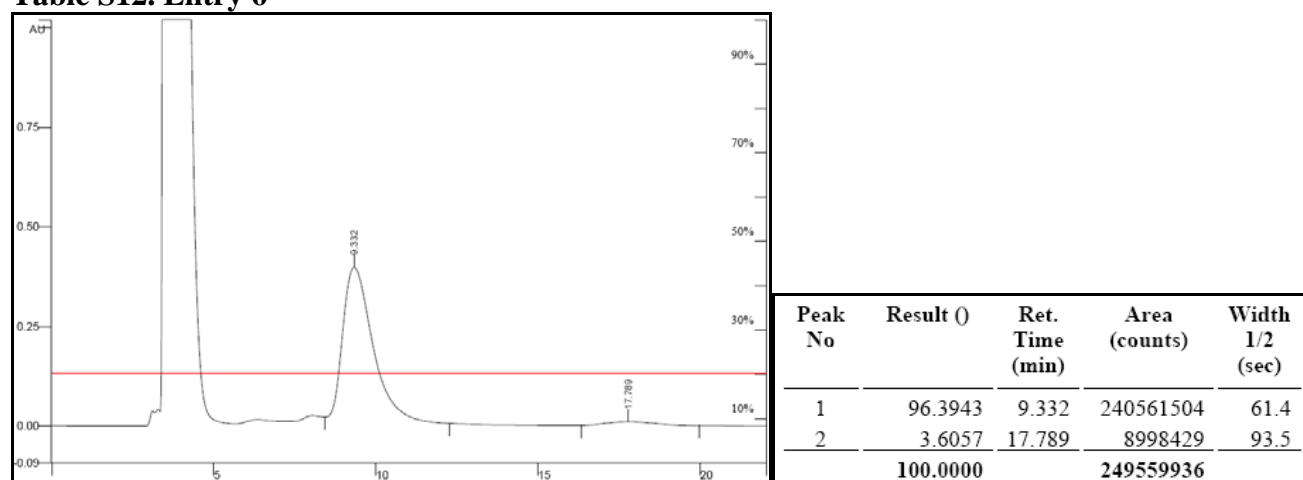

## 10. HPLC spectra for Figure 6

### HPLC spectrum for catalyst in 0.01 M concentration

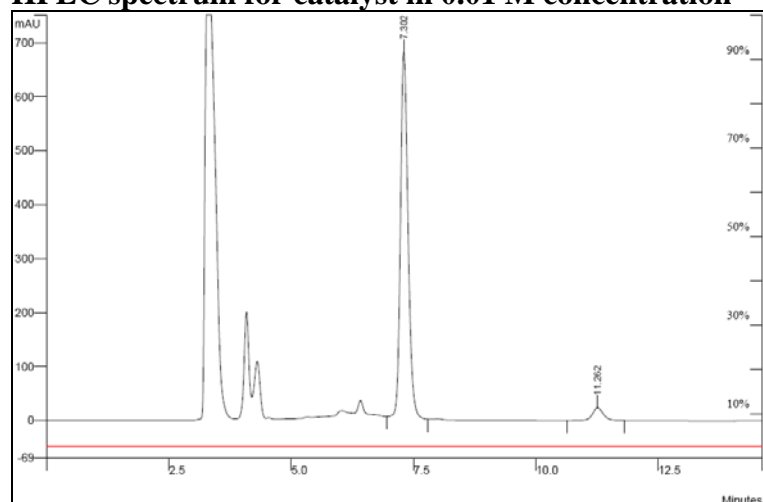

| Peak No | Result ()       | Ret. Time (min) | Area (counts)   | Width 1/2 (sec) |
|---------|-----------------|-----------------|-----------------|-----------------|
| 1       | 95.2949         | 7.302           | 72714280        | 9.7             |
| 2       | 4.7051          | 11.262          | 3590216         | 13.8            |
|         | <b>100.0000</b> |                 | <b>76304496</b> |                 |

### HPLC spectrum for catalyst in 0.02 M concentration

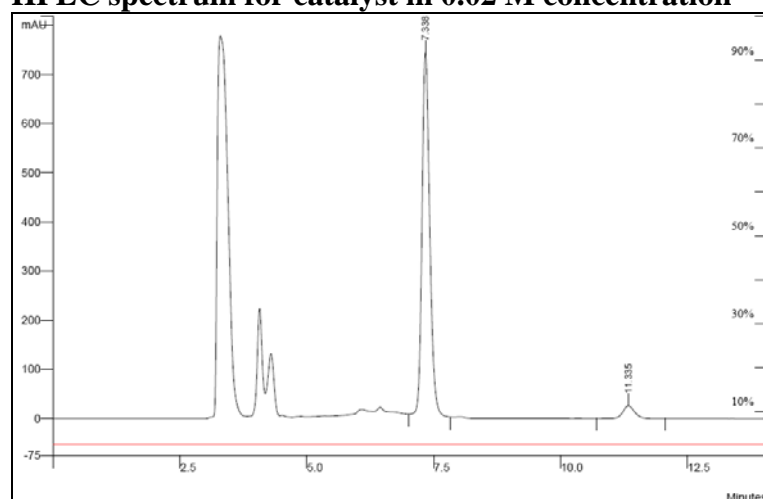

| Peak No | Result ()       | Ret. Time (min) | Area (counts)   | Width 1/2 (sec) |
|---------|-----------------|-----------------|-----------------|-----------------|
| 1       | 95.1139         | 7.338           | 77977920        | 9.6             |
| 2       | 4.8861          | 11.335          | 4005835         | 14.2            |
|         | <b>100.0000</b> |                 | <b>81983752</b> |                 |

### HPLC spectrum for catalyst in 0.05 M concentration

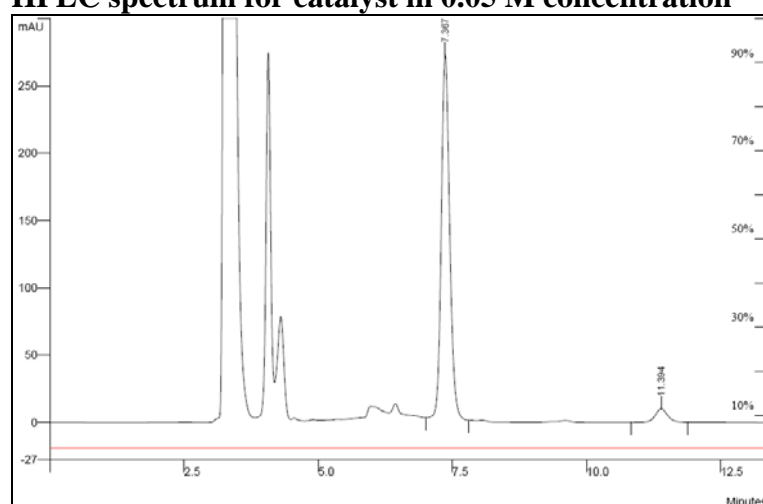

| Peak No | Result ()       | Ret. Time (min) | Area (counts)   | Width 1/2 (sec) |
|---------|-----------------|-----------------|-----------------|-----------------|
| 1       | 95.0046         | 7.367           | 29307148        | 9.8             |
| 2       | 4.9954          | 11.394          | 1540986         | 14.2            |
|         | <b>100.0000</b> |                 | <b>30848134</b> |                 |

### HPLC spectrum for catalyst in 0.10 M concentration

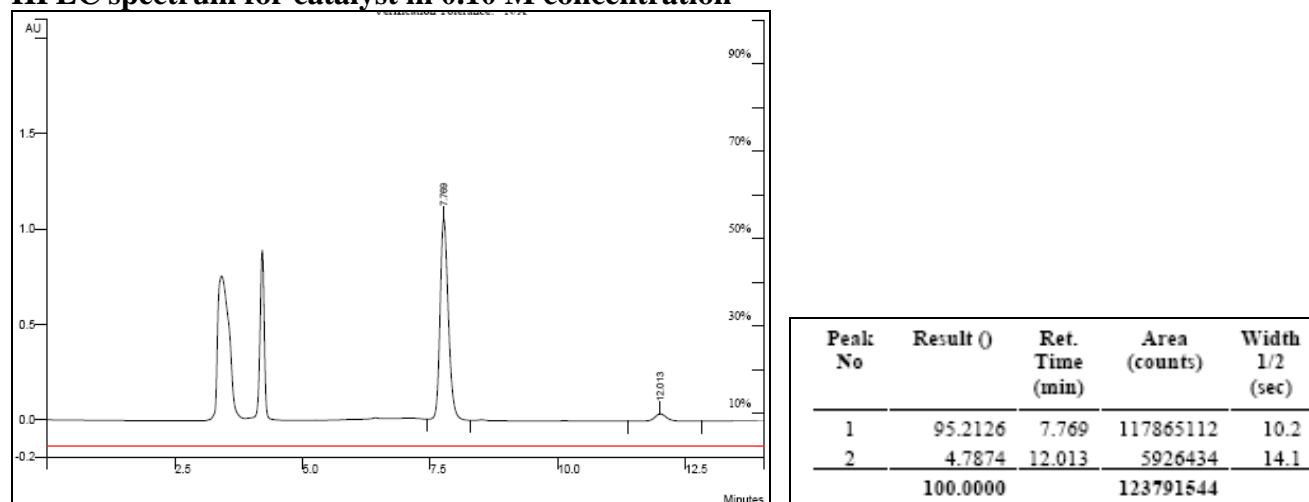

## 11. References

- [1] J. Liang, J. C. Ruble, G. C. Fu, *J. Org. Chem.* **1998**, *63*, 3154-3155.
- [2] (a) B.-J. Li, L. Jiang, M. Liu, Y.-C. Chen, L.-S. Ding, Y. Wu, *Synlett* **2005**, 603-606; (b) B. Vakulya, S. Varga, A. Csámpai, T. Soós, *Org. Lett.* **2005**, *7*, 1967-1969.
- [3] (a) M. Kaik, J. Gawroński, *Tetrahedron: Asymmetry* **2003**, *14*, 1559-1563; (b) T. Okino, Y. Hoashi, T. Furukawa, X. Xu, Y. Takemoto, *J. Am. Chem. Soc.* **2005**, *127*, 119-125.
- [4] J. P. Malerich, K. Hagihara and V. H. Rawal, *J. Am. Chem. Soc.* **2008**, *130*, 14416-14417.
- [5] Y. Chen, S.-K. Tian, L. Deng *J. Am. Chem. Soc.* **2000**, *122*, 9542-9543.
- [6] C. E. Song, Ji Woong Lee, Tae Hi Ryu, Joong Suk Oh, Han Yong Bae, Hyeong Bin Jang, *Chem. Commun.* **2009**, 7224-7226.
